1 **Title: Genomic evidence for West Antarctic Ice Sheet collapse during the Last**  
2 **Interglacial**

3  
4 **Authors:** Sally C. Y. Lau<sup>1,2\*</sup>, Nerida G. Wilson<sup>3,4,5</sup>, Nicholas R. Golledge<sup>6</sup>, Tim R. Naish<sup>6</sup>,  
5 Phillip C. Watts<sup>7</sup>, Catarina N. S. Silva<sup>1,8</sup>, Ira R. Cooke<sup>9</sup>, A. Louise Allcock<sup>10</sup>, Felix C. Mark<sup>11</sup>,  
6 Katrin Linse<sup>12</sup>, Jan M. Strugnell<sup>1,2</sup>

7 **Affiliations:**

8 <sup>1</sup>Centre for Sustainable Tropical Fisheries and Aquaculture and College of Science and  
9 Engineering, James Cook University; Townsville, Qld, Australia

10 <sup>2</sup>Securing Antarctica's Environmental Future, James Cook University, Townsville, Qld, Australia

11 <sup>3</sup>Collections & Research, Western Australian Museum; Welshpool, WA, Australia

12 <sup>4</sup>School of Biological Sciences, University of Western Australia; Perth, WA, Australia

13 <sup>5</sup>Securing Antarctica's Environmental Future, Western Australian Museum; Welshpool, WA,  
14 Australia

15 <sup>6</sup>Antarctic Research Centre, Victoria University of Wellington; Wellington, New Zealand

16 <sup>7</sup>Department of Biological and Environmental Science, University of Jyväskylä; Jyväskylä,  
17 Finland

18 <sup>8</sup>Department of Life Sciences, Marine and Environmental Sciences Centre, University of  
19 Coimbra, Coimbra, Portugal

20 <sup>9</sup>Centre for Tropical Bioinformatics and Molecular Biology, James Cook University; Townsville,  
21 Qld, Australia

22 <sup>10</sup>School of Natural Sciences and Ryan Institute, University of Galway; Galway, Ireland

23 <sup>11</sup>Alfred Wegener Institute, Helmholtz Centre for Polar and Marine Research; Bremerhaven,  
24 Germany

25 <sup>12</sup>British Antarctic Survey; Cambridge, United Kingdom

26 \*Corresponding author. Email: [cheukying.lau@jcu.edu.au](mailto:cheukying.lau@jcu.edu.au)

27 **Abstract:**

28 The marine-based West Antarctic Ice Sheet (WAIS) is considered vulnerable to irreversible  
29 collapse under future climate trajectories and its tipping point may even lie within the mitigated  
30 warming scenarios of 1.5–2 °C of the United Nations Paris Agreement. Knowledge of ice loss  
31 during similarly warm past climates, including the Last Interglacial, when global sea levels were  
32 5–10 m higher than today, and global average temperatures of 0.5–1.5 °C warmer than  
33 preindustrial levels, could resolve this uncertainty. Here we show, using a panel of genome-wide,  
34 single nucleotide polymorphisms of a circum-Antarctic octopus, persistent, historic signals of  
35 gene flow only possible with complete WAIS collapse. Our results provide the first empirical  
36 evidence that the tipping point of WAIS loss could be reached even under stringent climate  
37 mitigation scenarios.

38

39 **One-Sentence Summary:**

40 Historical gene flow in marine animals indicate the West Antarctic Ice Sheet collapsed during  
41 the Last Interglacial.

42 Climate change continues to cause unprecedented warming to the Earth system (1). The  
43 consequences of warming are leading to rapid changes in Antarctica, including Antarctic Ice  
44 Sheet mass loss, with global impacts (1). A major uncertainty in global mean sea level (GMSL)  
45 rise projections lies in the potential instability of the West Antarctic Ice Sheet (WAIS) (2). The  
46 marine-based WAIS has lost  $159 \pm 8$  gigatons of ice mass per year between 1979–2017 (3), and  
47 will continue to be a major contributor to GMSL rise under all CO<sub>2</sub> emission scenarios (4). It is  
48 unclear whether the WAIS is vulnerable to rapid ice loss or even full collapse, because of a poor  
49 understanding of future changes and processes that influence ice sheet dynamics (2). WAIS  
50 collapse could raise global sea level by ~3.3–5 m (5, 6), with direct consequences that include  
51 human displacement and global loss of ecosystems in coastal areas (1).

52

53 It is well understood from geological reconstructions that there were interglacial peaks, referred  
54 to as super-interglacials, in periods of the Pleistocene that experienced warmer temperatures  
55 ( $+0.5$ – $1.5$  °C) and higher GMSL (up to +10 m) than present (4). These super-interglacials  
56 include Marine Isotope Stages (MIS) 31, 11 and 5e, which occurred at approximately ~1.08–1.05  
57 Ma, ~424–395 ka and ~129–116 ka, respectively (4). During MIS 31, the Southern Ocean sea  
58 surface temperature may have reached  $+5 \pm 1.2$  °C above present during summer months (7).  
59 During MIS 11, global mean surface temperature (GMST) was  $0.5 \pm 1.6$  °C with GMSL 6–13 m  
60 higher than present, and similarly, during MIS 5e (the Last Interglacial), GMST was  $+0.5$ – $1.5$  °C  
61 with GMSL 5–10 m higher than present (4). To date, there is no empirical evidence to indicate if  
62 the WAIS has completely collapsed at any time in the three million years since the Pliocene (8,  
63 9). Inferring WAIS configurations during late Pleistocene super-interglacial periods could  
64 therefore inform the sensitivity of Antarctic ice-sheet response to climate change. So far,

65 analyses of ice proximal marine drill core records show evidence of WAIS retreat during the late  
66 Pleistocene interglacials, but the exact timing (10) and extent (9, 11) of any WAIS collapse  
67 remain ambiguous. Existing ice sheet models have yielded conflicting WAIS reconstructions  
68 during these periods, ranging from no collapse (12), to partial (13) or full collapse (14, 15).  
69 Knowledge about how the WAIS was configured during super-interglacials in the geological past  
70 is urgently needed to constrain future sea-level rise projections (2). Novel approaches, such as  
71 population genomics, can serve as empirical proxies of past changes to the Antarctic Ice Sheet,  
72 detected via signals of historic gene flow among currently separated populations of marine  
73 organisms (16).

74

75 A complete past collapse of the WAIS would have opened the trans-West Antarctic seaways  
76 linking the present-day Weddell Sea (WS), Amundsen Sea (AS) and Ross Sea (RS) (16). Such  
77 seaways would have allowed marine benthic organisms to occupy and disperse across the opened  
78 straits, thus leaving genetic signatures of this past connectivity in the genomes of their  
79 descendent, extant populations (16) (hereafter seaway populations). As the WAIS reformed,  
80 these organisms would be isolated again within the WS, AS and RS basins, with any subsequent  
81 connectivity only possible around the continental margin. Although there is some support for  
82 existence of trans-Antarctic seaways based on species assemblage data at macro-evolutionary  
83 scales (17–20) or low-resolution genetic data (21–24), all these studies lack power and/or spatial  
84 coverage to distinguish between past dispersal via trans-West Antarctic seaways or from  
85 contemporary circumpolar ocean currents. Importantly, these previous studies cannot be used for  
86 accurate demographic modelling to identify the likely timing of any collapse of the WAIS.

87

88 Collection of benthic species from the Southern Ocean is logistically challenging and regions  
89 such as AS and East Antarctica (EA) are difficult to access. Existing samples are typically  
90 characterised by DNA degradation due to long term storage in collections at room temperature.  
91 Here, we used a target capture approach that sequenced genome-wide, single nucleotide  
92 polymorphism (SNP) data in the circum-Antarctic benthic octopus, *Pareledone turqueti*,  
93 incorporating rare samples from AS and EA, collected over 33 years. Our approach enabled a  
94 comprehensive sampling strategy to robustly date and test for the presence of past trans-West  
95 Antarctic seaways using biological data as proxies.

96

97 We sequenced genome-wide SNPs derived from double-digest restriction site-associated DNA  
98 (ddRAD) (25) loci from 96 *P. turqueti* individuals collected from around the Southern Ocean  
99 (Fig. 1A). The dataset presents a circum-Antarctic overview of the species genetic patterns,  
100 which record the contemporary connectivity driven by oceanic currents, mainly the Antarctic  
101 circumpolar current (ACC; clockwise) and the Antarctic Slope Current (ASC; counter-  
102 clockwise) (Fig. 1A, B), as well as any historical connectivity that would be associated with past  
103 trans-West Antarctic seaways. We used a reduced single-nucleotide polymorphisms (SNPs)  
104 dataset (one SNP per locus) to analyse population structure, which included 5,188 unlinked  
105 SNPs. Complementary analyses (*Structure*, *TreeMix*) suggest the population genomic variation  
106 of *P. turqueti* is characterised by geographically-structured populations across the Southern  
107 Ocean (Fig. 1C, fig. S1-S2). This makes it an appropriate species to test for the presence of trans-  
108 West Antarctic seaways as signals of historical WAIS collapse in highly admixed species would  
109 likely be masked by contemporary gene flow signatures (16). *Pareledone turqueti* can disperse  
110 via benthic crawling as adults and as hatchlings (inferred from large egg size [maximum oocyte

111 length=19.8mm] and small number of eggs per clutch [n=22-66]) (26, 27). It has also been  
112 suggested that long-distance dispersal in *P. turqueti* may be achieved, at least occasionally, via  
113 adults or egg masses rafting on floating substrates, or that their benthic egg masses could become  
114 dislodged and disperse through the currents (23), although no direct evidence supports this yet.  
115  
116 In *P. turqueti*, long-distance connectivity linking East and West Antarctica is detected across the  
117 Antarctic continental shelf and Antarctic islands (Fig. 1C), likely indicating dispersal that reflects  
118 contemporary circumpolar currents, as found in other Southern Ocean benthic taxa (28). If the  
119 genomic data of *P. turqueti* can only be explained by serial circumpolar colonisation around the  
120 Antarctic continent, then observed and expected heterozygosity would decrease as geographical  
121 distance increases, yet the observed data does not support this scenario (fig. S3, table S1).  
122 Admixture is also observed between individuals from RS and AS with some individuals from  
123 WS (Fig. 1C), indicating a potential signature of trans-West Antarctic seaways. Supporting this  
124 concept, population differentiation analysis shows limited genetic divergence between WS-RS  
125 relative to other localities that are adjacent to each other (fig. S4).

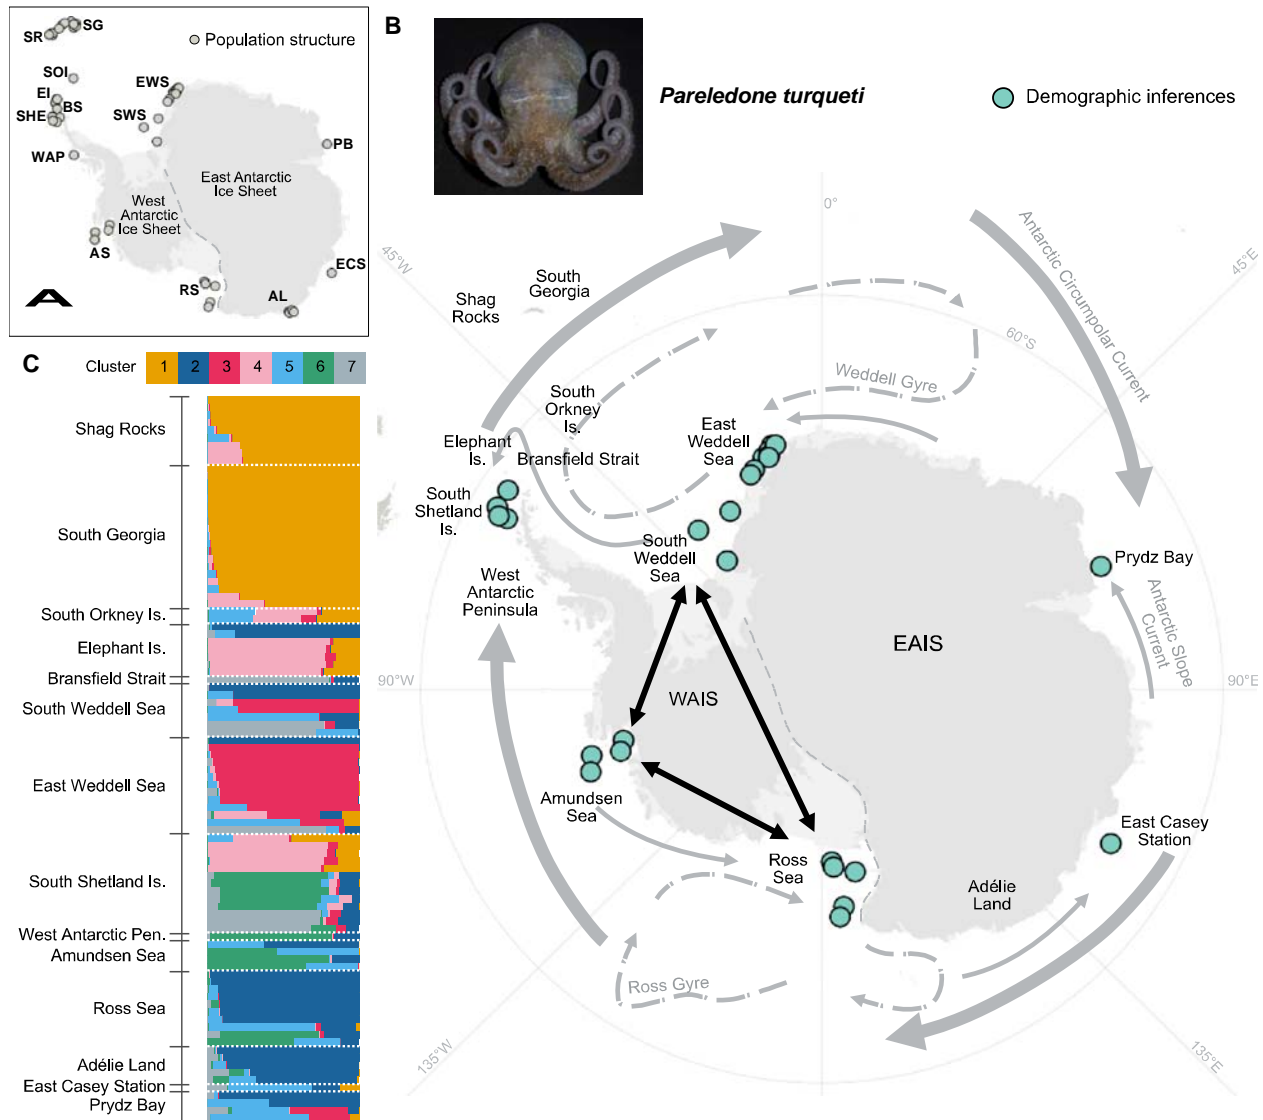

126

127 **Fig. 1 Sample locations of *Pareledone turqueti* with *Structure* analyses.** (A) Samples used for  
 128 analyses of population structure. Abbreviations: Shag Rocks, SR; South Georgia, SG; South  
 129 Orkney Is., SOI; Elephant Is., EI; Bransfield Strait, BS; South Shetland Is., SHE; West Antarctic  
 130 Peninsula, WAP; South- and East- Weddell Sea, S-, E-WS; Amundsen Sea, AS; Ross Sea, RS;  
 131 Adélie Land, AL; East Casey Station, ECS; Prydz Bay, PB; West Antarctic Ice Sheet, WAIS;  
 132 East Antarctic Ice Sheet, EAIS. (B) Samples used for admixture analyses and demographic  
 133 modelling (collectively demographic inferences) to test for the existence of trans-West Antarctic  
 134 seaways. Map includes the directionalities of the major contemporary circumpolar currents and  
 135 regional currents in the Southern Ocean. Black arrows indicate connectivity pathways through  
 136 trans-West Antarctic seaways that would result from WAIS collapse. Direct connectivity  
 137 between WS-AS or AS-RS would indicate partial WAIS collapse, and direct connectivity  
 138 between WS-AS-RS or WS-RS would indicate complete WAIS collapse. Photo credit of *P.*  
 139 *turqueti* specimen: Elaina M. Jorgensen. (C) Clustering analysis using *Structure* inferred  $K = 7$

140 for *P. turqueti* (5,188 SNPs dataset). Each horizontal bar represents an individual sample, bars  
141 are grouped by geographical locations, colours within each bar correspond to the proportion of  
142 each genetic cluster in the individual.

143

144 Focusing on populations most informative of whether the WAIS collapsed in the past, we first  
145 examined whether there was distinct admixture between WS-AS-RS with respect to South  
146 Shetland Islands (SHE) and East Antarctica (EA; including Prydz Bay and East Casey Station)  
147 samples using 120,857 SNPs (Fig. 1B). SHE and EA are known to be influenced by both the  
148 ACC and ASC (29), but are peripheral to the putative historical trans-West Antarctic  
149 connectivity; thus these are ideal locations that can separate patterns of present-day connectivity  
150 around the WAIS and East Antarctic Ice Sheet (EAIS) from persistent, historical signals of gene  
151 flow.

152

153 We examined allele frequency correlations across WS, AS and RS with respect to SHE and EA.  
154 The  $D$ -statistic (30) explores the patterns of allele sharing across four populations to test for  
155 evidence of admixture between populations of interest. The outgroup- $f_3$ -statistic (31) explores  
156 the amount of derived allele frequency that is shared between pairs of populations relative to an  
157 outgroup population. The presence of admixture linked to trans-West Antarctic connectivity  
158 would result in high  $f_3$  values, and evidence of excess allele sharing ( $D > 0$ ), between WS-AS-RS.  
159 In *P. turqueti*, the highest  $f_3$  values are detected between AS–RS, followed by RS–EA and RS–  
160 WS (Fig. 2A); indicating recent common ancestry across seaway populations, as well as between  
161 RS and EA populations that are adjacent to each other. When SHE is treated as the sister lineage  
162 to AS/RS and WS ( $D(\text{AS/RS}, \text{SHE}, \text{WS}, \text{outgroup})$ ), there is excess allele sharing between  
163 AS/RS and WS (Fig. 2B). When EA is treated as sister lineage to AS/RS and WS ( $D(\text{AS/RS}, \text{EA}, \text{WS}, \text{outgroup})$ ), excess allele sharing is also observed between AS/RS and WS (Fig. 2B). If



165 circumpolar currents (ASC and ACC) were the only factors that have influenced gene flow  
 166 patterns in *P. turqueti*, then low  $f_3$  values would be observed between WS-RS as they are  
 167 situated on the opposite side of West Antarctica, and excess allele sharing ( $D$ ) would also be  
 168 observed between WS-SHE and WS-EA as they are geographically adjacent. However, these  
 169 results confirmed that in *P. turqueti* there are unexpected and significant allele frequency  
 170 correlations among AS-RS-WS, despite also considering the locations situated between them  
 171 around the WAIS (SHE) and EAIS (EA). Such observed admixture patterns are congruent with  
 172 historical seaway connectivity in a species that is characterised by geographically-structured  
 173 populations.  
 174

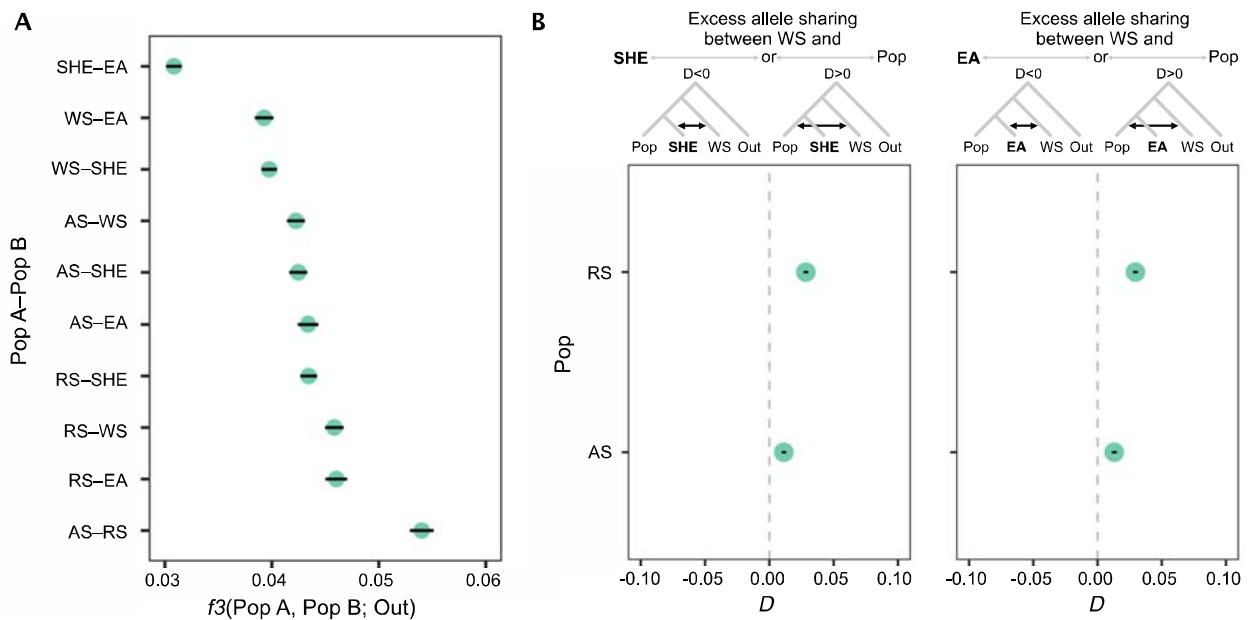

175

176 **Fig. 2 Evidence of distinct allele frequency correlations between Amundsen Sea, Weddell**  
 177 **Sea and Ross Sea, as well as contemporary gene flow in *Pareledone turqueti*.** Error bars  
 178 (black horizontal lines) = standard errors, filled circles = significant (Z-score values  $> 3$  or  $< -3$ ),  
 179 Out = outgroup population, which includes Shag Rocks and South Georgia (samples combined).  
 180 Data = 120,857 SNPs dataset. Abbreviations: Weddell Sea (WS), South Shetland Islands (SHE),  
 181 Amundsen Sea (AS), Ross Sea (RS), East Antarctica (EA). (A) Outgroup- $f_3$ -statistics between  
 182 pairs of populations. As  $f_3$  value increases, more derived allele frequency is shared between the  
 183 pairs of population. (B)  $D$ -statistic (in the form of BABA-ABBA) examines patterns of alleles

184 sharing across four populations, and indicates whether there is excess allele sharing between  
185 distinct populations. Left panel:  $D$ -statistic is presented in the form of  $D(\text{Pop}, \text{SHE}, \text{WS}, \text{Out})$ ,  
186 which examines whether there is excess allele sharing between SHE and WS ( $D < 0$ ; ABBA) or  
187 Pop and WS ( $D > 0$ ; BABA). Right panel:  $D$ -statistic is presented in the form of  $D(\text{Pop}, \text{EA}, \text{WS},$   
188  $\text{Out})$ , which examines whether there is excess allele sharing between EA and WS ( $D < 0$ ; ABBA)  
189 or Pop and WS ( $D > 0$ ; BABA).  
190

191 A site-frequency-spectrum (SFS)-based, coalescent demographic modelling framework  
192 (*fastsimcoal* (32)) was used to test the hypothesis of whether historical trans-Antarctic seaways  
193 existed, with populations subsequently influenced by contemporary circumpolar gene flow. For  
194 demographic modelling, we included samples from WS, AS, RS and EA with 163,335 SNPs in  
195 *P. turqueti*. We employed a hierarchical approach to test for WAIS collapse scenarios while  
196 incorporating modern circumpolar gene flow in the models (fig. S5-S6). Step 1 compared  
197 contrasting scenarios of past WAIS configurations with circumpolar gene flow following the  
198 directionality of the ACC (clockwise). The models incorporated WS, EA, RS and AS  
199 experiencing continuous circumpolar gene flow since population divergence. Under these  
200 scenarios, after population divergence, WS, AS, RS experienced no, partial, or complete  
201 connectivity, followed by modern ACC gene flow linking between WS, EA, RS and AS. Limited  
202 differentiation was found between competing scenarios (no, partial, or complete connectivity) at  
203 step 1 (fig. S7-S8). Therefore, at step 2, model complexity was increased to model more  
204 ecologically realistic scenarios, with circumpolar gene flow following both directionalities of the  
205 ACC and ASC (counter-clockwise) for all scenarios (fig. S9-S10). At step 3, unmodelled  
206 ancestral size change was further considered to distinguish competing models from the previous  
207 step.  
208

209 The observed SFSs were statistically best explained by the scenario of a complete historical  
210 WAIS collapse (Fig. 3A, fig. S11-S12), followed by modern circumpolar gene flow linked to  
211 ACC and ASC. The ancestral lineage of WS, AS, RS and EA populations experienced an  
212 expansion followed by a bottleneck (Fig. 3A, table S2). During the mid-Pliocene, which ended at  
213 ~3 million years ago (95% CI between 3.6 and 3.5 Mya), the best model supports WS, AS, RS  
214 and EA continental shelf locations splitting into four populations with direct asymmetric gene  
215 flow detected between WS-AS-RS. This suggests that ancient seaways were likely opened across  
216 the WAIS, which directly linked the present day WS, AS and RS, and could only be facilitated  
217 by WAIS collapse during past interglacials. The start of the historical, direct WS-AS-RS  
218 connectivity began at ~3.6-3.0 Mya, which supports geological evidence of historical WAIS  
219 collapses during the Pliocene (8, 9). The signature of direct WS-AS-RS connectivity ceased  
220 between 139 and 54 ka (based on 95% CI; Fig. 3A), and which is in accordance with the end of  
221 the Last Interglacial.

222  
223 Considering the estimated confidence intervals, the cessation of direct gene flow between WS-  
224 AS-RS could only be associated to the most recent interglacial MIS 5e (129–116 ka), because the  
225 prior super-interglacial (MIS 11; ~424–395 ka), which would also enable such direct  
226 connectivity, is far outside of the upper uncertainty bound of the connectivity. The maximum  
227 likelihood value of the direct WS-AS-RS connectivity was dated to 87 ka; the time lag between  
228 87 ka and the time of MIS 5e (129–116 ka) can be explained at least in part by the time it takes  
229 for complete trans-West Antarctic migration to influence allele frequencies in a benthic direct  
230 developing octopus. Finally, contemporary circumpolar gene flow began after 87 ka, following  
231 the directions as the ACC and ASC, which generally reflects the influence of ongoing

232 circumpolar currents on gene flow of Southern Ocean benthic taxa, in particular the ACC (28).  
233 For example, the high migration rates observed from WS->EA and RS->AS reflect the strength  
234 of ACC relative to ASC. To support the logic that populations were split from the same ancestral  
235 population, we considered the alternative tree topologies of diverse 3-population models  
236 involving WS, RS and EA or SHE (fig. S13-S14). In all cases, recent, shared ancestry between  
237 RS and WS is not an alternative explanation for the observed data (table S3-S4), with consistent  
238 outcomes supporting historic direct gene flow between WS-RS ending at around the Last  
239 Interglacial. The implication is that the conclusion of WAIS collapse is robust to the model  
240 assumption of a split from the same ancestral population.

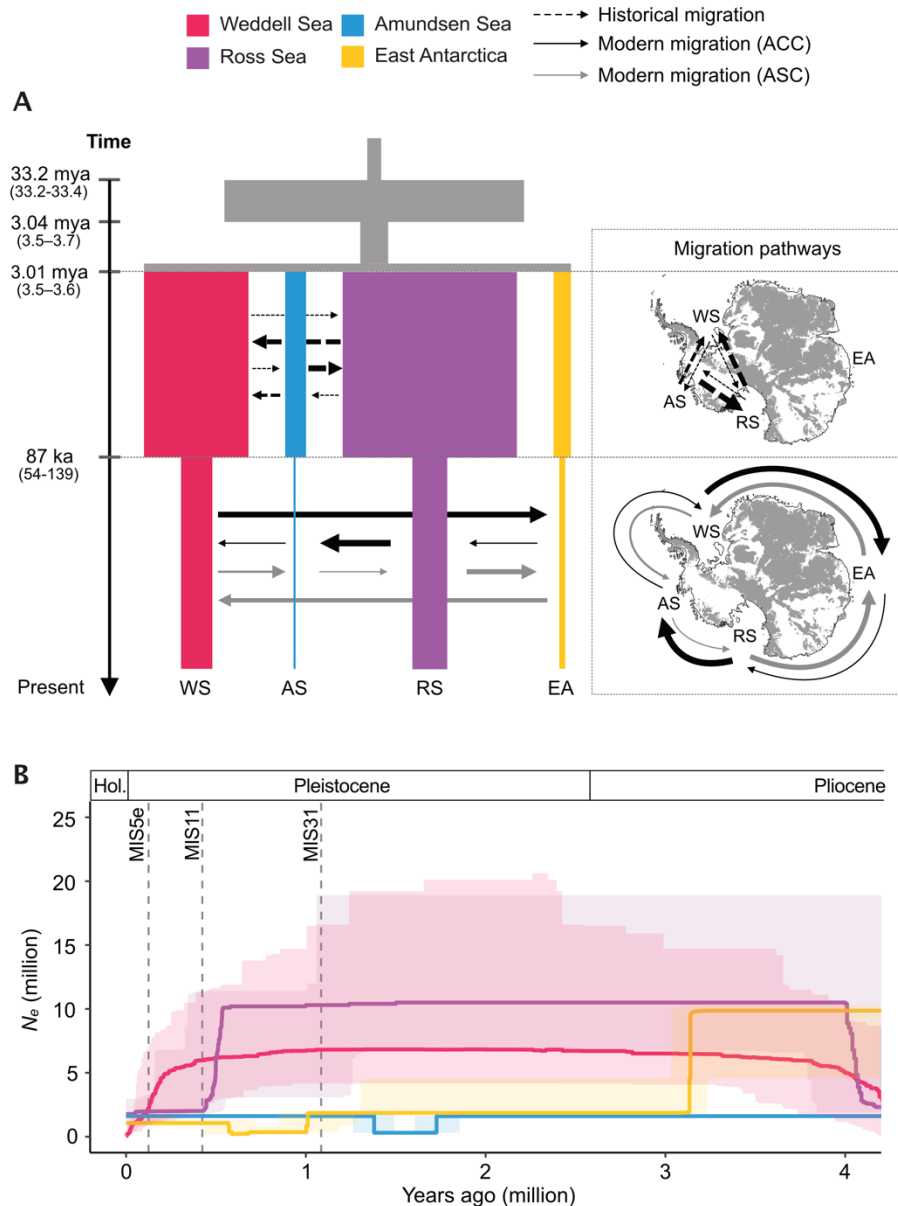

241

242 **Fig. 3 The best-supported demographic model for *Pareledone turqueti* indicated signatures**  
 243 **of complete historical West Antarctic Ice Sheet collapse began during the mid-Pliocene**  
 244 **until the end of Marine Isotope Stage (MIS) 5e, supplemented by a StairwayPlot which**  
 245 **indicated past changes in population size. (A) Maximum likelihood model for *P. turqueti***  
 246 **including Amundsen Sea (AS), Ross Sea (RS), Weddell Sea (WS) and East Antarctica (EA)**  
 247 **populations, shows direct historical gene flow (3 Mya–87 ka) between WS, AS and RS, and**  
 248 **modern gene flow (87–0 ka) around the Antarctic continental shelf following the directionality**  
 249 **of the Antarctic Circumpolar Current (ACC; clockwise) and Antarctic Slope Current (ASC;**  
 250 **counter-clockwise). Maximised parameter estimates are visualised. The associated 95%**  
 251 **confidence intervals (CI) are in brackets and reported in Table S2. Time of the events modelled**  
 252 **are shown on the left. The width of the bars is proportional to the effective population size of the**

253 population. Arrows indicate migration (forward in time), with the width of the arrows  
254 proportional to the number of migrants per generation ( $2Nm$ ). The migration pathways, based on  
255 modelled migration directions (forward in time), are also visualised on a map of Antarctica. Map  
256 shows sub-glacial bed elevation  $>0$  m above present-day sea level and is extracted from  
257 Bedmap2 (33). Data = 163,335 SNPs dataset. **(B)** *StairwayPlot* reconstruction of past changes in  
258 effective population size over time in *P. turqueti* in the last  $\sim 4$  Mya. Line = median, shaded area  
259 = 2.5% and 97.5% confidence limits. Data = 191,024 SNPs dataset. Dashed vertical lines  
260 represent timing of Marine Isotope Stage 5e (MIS 5e;  $\sim 125$  ka), Marine Isotope Stage 11 (MIS  
261 11;  $\sim 424$  ka) and Marine Isotope Stage 31 (MIS 31;  $\sim 1.08$  mya). Abbreviation: Holocene, Hol.  
262

263 One of the biggest challenges of inferring demographic events in the late Pleistocene include  
264 whether the species experienced a severe bottleneck (i.e. sharp reduction in  $N_e$ ) in the recent past  
265 that eroded genomic history. For example, if the WAIS had collapsed in the late Pleistocene,  
266 large areas of newly ice-free habitats (where the WAIS existed previously) would have become  
267 available for benthic fauna to disperse and colonise. During the subsequent glacial maximum, as  
268 the AIS expanded across the Antarctic continental shelf, the marine shelf habitats would likely  
269 be reduced to small, isolated pockets of *in situ* ice-free refugia (34). Such changes in habitat  
270 availability would likely lead to severe population bottlenecks and subsequent genetic drift (34).  
271 As a result, a recent severe bottleneck could lead to loss of alleles, increased coalescence rate and  
272 events only dating back to the time of most recent bottleneck (35) (i.e. Last Glacial Maximum  
273 [LGM] at  $\sim 20$  ka in *P. turqueti*). Demographic models detected events prior to LGM in *P.*  
274 *turqueti*, suggesting this species did not experience population bottlenecks in the recent past as  
275 severe as might be expected for a Southern Ocean benthic species.

276

277 We searched for signals of population size fluctuation prior to the LGM in *P. turqueti* using  
278 *StairwayPlot* (36), an SFS-based model-free method. We found that the demographic changes  
279 dated by *StairwayPlot* generally correspond with the dating of gene flow changes by *fastsimcoal*.

280 Pronounced demographic changes (observed from Fig. 3B) were detected in the RS and WS  
281 populations at ~435 ka and ~200 ka. These timings coincide with the glacial stage MIS 12 and  
282 the relatively cool interglacial of MIS 7, both of which were subsequently followed by periods of  
283 peak warmth during MIS 11 and MIS 5e respectively. In species with population structure,  
284 population decline at a particular timepoint in *StairwayPlot* corresponds to signal of  
285 demographic change such as changes in population structure and migration rate (37). For the  
286 case of *P. turqueti*, the population decline detected in RS around MIS 11 and in WS around MIS  
287 5e corresponds to demographic change likely associated with WAIS collapse. In the *fastsimcoal*  
288 model (Fig. 3A), the population decline detected across all populations after the Last interglacial  
289 also corresponds to the widely-accepted hypothesis that there would be limited *in situ* ice-free  
290 refugia on the Antarctic continental shelf during the LGM, leading to population bottlenecks in  
291 benthic species that only survived on the shelf (34) (i.e. the case for *P. turqueti* (23)). These  
292 patterns suggest that recent super-interglacials and the LGM likely strongly influenced species  
293 demography, particularly in populations associated with the signatures of WAIS collapse.

294  
295 Estimation of past changes in population size with *StairwayPlot* indicated AS and EA  
296 populations experienced relatively stable populations since 3 Mya, while *fastsimcoal* indicated  
297 population size changes in these populations; such discordances are likely due to method-specific  
298 sensitivity in populations with low sample size in regions that are challenging to collect  
299 biological samples ( $n \leq 5$  in AS and EA). Overall, the timing of demographic events detected by  
300 independent inferences also corroborates the timings of major glacial-interglacial fluctuations in  
301 the Pliocene and the late Pleistocene, as well as events dated using independent markers

302 (mitochondrial data) (23). Therefore, the dating of WAIS collapse, as seen through the genomic  
303 data of *P. turqueti* appears to be robust and unconfounded by noise.

304

305 Our demographic modelling approach was specifically designed to test whether trans-West  
306 Antarctic seaways existed in the past that could be detected with simple contrasting models. The  
307 best-supported demographic model was able to characterize an overview of the historical, direct  
308 WS-AS-RS connectivity linked to WAIS collapses through the Pliocene and as late as MIS 5e.  
309 While additional periods of seaway closure occurred during other geological periods between 3  
310 Mya and MIS 5e, our analyses are focused on dating the most recent gene flow linked to  
311 historical WAIS collapse. The evolutionary history of *P. turqueti* is highly complex and  
312 populations would have experienced unique demographic changes associated with each glacial-  
313 interglacial cycle throughout the Quaternary. We did not sequentially reconstruct their past  
314 changes in population size and connectivity patterns to avoid over-parameterisation. Signatures  
315 of recent events are more clearly encoded in allele frequencies. We utilised a target capture  
316 approach that can sequence reduced representation genomic data in samples with DNA  
317 degradation. Our reduced representation SNP dataset has the power to reflect recent major events  
318 dated to around MIS 5e, MIS 11 and the Pliocene. Regardless of the overall challenge of  
319 demographic modelling for Southern Ocean species, signatures of a complete WAIS collapse,  
320 last detected at around the MIS 5e, were clear in *P. turqueti*.

321

322 We provide empirical evidence indicating that the genomic signatures of marine-based sectors  
323 WAIS collapse were present during the Last Interglacial (MIS 5e), when GMST was 0.5–1.5 °C  
324 warmer than the preindustrial. Future WAIS collapse on centennial timescales is considered as a



325 low likelihood process (4), however, in recent trajectories estimated for temperature rise, such as  
326 for the most optimistic emission scenario Shared Socio-economic Pathway (SSP) 1-1.9, the air  
327 temperature is projected to reach +1.2–1.7 °C by 2100 (very likely range) (4). Moreover,  
328 Antarctic Ice Sheet models simulating the response to Intergovernmental Panel on Climate  
329 Change (IPCC) emissions scenarios (15, 38) show a threshold is crossed when warming is above  
330 SSP2-2.6 (the Paris climate target), whereby, ice shelves are lost and marine-based sectors of  
331 WAIS undergo self-reinforcing melting due to marine ice sheet instability processes. This study  
332 provides empirical evidence indicating WAIS collapsed when global mean temperature was  
333 similar to today, suggesting the tipping point of future WAIS collapse is close. Future global sea-  
334 level rise projections should consider the irreversible collapse of the WAIS, and some marine  
335 sectors of the EAIS (39), which will commit the planet to multi-metre GMSL over the coming  
336 centuries and millennium if global warming exceeds +1.5–2 °C above preindustrial levels (1, 8,  
337 40).

338

### 339 **Complete reference list**

- 340 1. IPCC, *Climate Change 2021: The Physical Science Basis. Contribution of Working Group*  
341 *I to the Sixth Assessment Report of the Intergovernmental Panel on Climate Change*  
342 (Cambridge University Press, Cambridge, United Kingdom and New York, NY, USA,  
343 2021).
- 344 2. F. Pattyn, M. Morlighem, The uncertain future of the Antarctic Ice Sheet. *Science*. **367**,  
345 1331–1335 (2020).
- 346 3. E. Rignot *et al.*, Four decades of Antarctic ice sheet mass balance from 1979–2017. *Proc*  
347 *Natl Acad Sci U S A*. **115**, 1095–1103 (2019).

- 348 4. B. Fox-Kemper *et al.*, “Chapter 9: Ocean, cryosphere, and sea level change” in *Climate*  
349 *Change 2021: The Physical Science Basis. Contribution of Working Group I to the Sixth*  
350 *Assessment Report of the Intergovernmental Panel on Climate Change* (Cambridge  
351 University Press, Cambridge and New York, 2021).
- 352 5. D. G. Vaughan, West Antarctic Ice Sheet collapse – The fall and rise of a paradigm. *Clim*  
353 *Change*. **91**, 65–79 (2008).
- 354 6. J. L. Bamber, R. E. M. Riva, B. L. A. Vermeersen, A. M. Lebrocq, Reassessment of the  
355 potential sea-level rise from a collapse of the west Antarctic ice sheet. *Science*. **324**, 901–  
356 903 (2009).
- 357 7. C. Beltran *et al.*, Southern Ocean temperature records and ice-sheet models demonstrate  
358 rapid Antarctic ice sheet retreat under low atmospheric CO<sub>2</sub> during Marine Isotope Stage  
359 31. *Quat Sci Rev*. **228**, 106069 (2020).
- 360 8. G. R. Grant *et al.*, The amplitude and origin of sea-level variability during the Pliocene  
361 epoch. *Nature*. **574**, 237–241 (2019).
- 362 9. T. Naish *et al.*, Obliquity-paced Pliocene West Antarctic ice sheet oscillations. *Nature*.  
363 **458**, 322–328 (2009).
- 364 10. R. P. Scherer *et al.*, Antarctic records of precession-paced insolation-driven warming  
365 during early Pleistocene Marine Isotope Stage 31. *Geophys Res Lett*. **35**, L03505 (2008).
- 366 11. R. McKay *et al.*, Pleistocene variability of Antarctic Ice Sheet extent in the Ross  
367 Embayment. *Quat Sci Rev*. **34**, 93–112 (2012).
- 368 12. M. D. Holloway *et al.*, Antarctic last interglacial isotope peak in response to sea ice retreat  
369 not ice-sheet collapse. *Nat Commun*. **7**, 12293 (2016).

- 370 13. N. R. Golledge *et al.*, Retreat of the Antarctic Ice Sheet During the Last Interglaciation  
371 and Implications for Future Change. *Geophys. Res. Lett.* **48**, e2021GL094513 (2021).
- 372 14. E. J. Steig *et al.*, Influence of West Antarctic Ice Sheet collapse on Antarctic surface  
373 climate. *Geophys Res Lett.* **42**, 4862–4868 (2015).
- 374 15. R. M. DeConto, D. Pollard, Contribution of Antarctica to past and future sea-level rise.  
375 *Nature.* **531**, 591–597 (2016).
- 376 16. J. M. Strugnell, J. B. Pedro, N. G. Wilson, Dating Antarctic ice sheet collapse: Proposing  
377 a molecular genetic approach. *Quat Sci Rev.* **179**, 153–157 (2018).
- 378 17. K. Linse, H. J. Griffiths, D. K. A. Barnes, A. Clarke, Biodiversity and biogeography of  
379 Antarctic and sub-Antarctic Mollusca. *Deep Sea Res 2 Top Stud Oceanogr.* **53**, 985–1008  
380 (2006).
- 381 18. D. K. A. Barnes, C. D. Hillenbrand, Faunal evidence for a late quaternary trans-Antarctic  
382 seaway. *Glob Chang Biol.* **16**, 3297–3303 (2010).
- 383 19. D. G. Vaughan, D. K. A. Barnes, P. T. Fretwell, R. G. Bingham, Potential seaways across  
384 West Antarctica. *Geochemistry, Geophys Geosystems.* **12**, Q10004 (2011).
- 385 20. C. Moreau *et al.*, Is reproductive strategy a key factor in understanding the evolutionary  
386 history of Southern Ocean Asteroidea (Echinodermata)? *Ecol Evol.* **9**, 8465–8478 (2019).
- 387 21. C. Held, J. W. Wägele, *Cryptic speciation in the giant Antarctic isopod Glyptonotus*  
388 *antarcticus* (Isopoda: Valvifera: Chaetiliidae). *Sci Mar.* **69**, 175–181 (2005).
- 389 22. K. Linse, T. Cope, A.-N. Lörz, C. Sands, Is the Scotia Sea a centre of Antarctic marine  
390 diversification? Some evidence of cryptic speciation in the circum-Antarctic bivalve  
391 *Lissarca notorcadensis* (Arcoidea: Philobryidae). *Pol Biol.* **30**, 1059–1068 (2007).

- 392 23. J. M. Strugnell, P. C. Watts, P. J. Smith, A. L. Allcock, Persistent genetic signatures of  
393 historic climatic events in an Antarctic octopus. *Mol Ecol.* **21**, 2775–2787 (2012).
- 394 24. G. E. Collins *et al.*, Genetic diversity of soil invertebrates corroborates timing estimates  
395 for past collapses of the West Antarctic Ice Sheet. *Proc Natl Acad Sci U S A.* **36**, 22293–  
396 22302 (2020).
- 397 25. B. K. Peterson, J. N. Weber, E. H. Kay, H. S. Fisher, H. E. Hoekstra, Double digest  
398 RADseq: An inexpensive method for de novo SNP discovery and genotyping in model  
399 and non-model species. *PLoS One.* **7**, e37135 (2012).
- 400 26. S. V. Boletzky, Embryonic development of cephalopods at low temperatures. *Antarct Sci.*  
401 **6**, 139–142 (1994).
- 402 27. I. M. Barratt, M. P. Johnson, M. A. Collins, A. L. Allcock, Female reproductive biology  
403 of two sympatric incirrate octopod species, *Adelieledone polymorpha* (Robson 1930) and  
404 *Pareledone turqueti* (Joubin 1905) (Cephalopoda: Octopodidae), from South Georgia. *Pol*  
405 *Biol.* **31**, 583–594 (2008).
- 406 28. A. Riesgo, S. Taboada, C. Avila, Evolutionary patterns in Antarctic marine invertebrates:  
407 An update on molecular studies. *Mar Genomics.* **23**, 1–13 (2015).
- 408 29. A. F. Thompson, A. L. Stewart, P. Spence, K. J. Heywood, The Antarctic Slope Current in  
409 a Changing Climate. *Rev Geophys.* **56**, 741–770 (2018).
- 410 30. E. Y. Durand, N. Patterson, D. Reich, M. Slatkin, Testing for ancient admixture between  
411 closely related populations. *Mol Biol Evol.* **28**, 2239–2252 (2011).
- 412 31. M. Raghavan *et al.*, Upper Palaeolithic Siberian genome reveals dual ancestry of Native  
413 Americans. *Nature.* **505**, 87–91 (2014).

- 414 32. L. Excoffier, I. Dupanloup, E. Huerta-Sánchez, V. C. Sousa, M. Foll, Robust  
415 Demographic Inference from Genomic and SNP Data. *PLoS Genet.* **9**, e1003905 (2013).
- 416 33. P. Fretwell *et al.*, Bedmap2: improved ice bed, surface and thickness datasets for  
417 Antarctica. *Cryosphere.* **7**, 375–393 (2013).
- 418 34. A. L. Allcock, J. M. Strugnell, Southern Ocean diversity: New paradigms from molecular  
419 ecology. *Trends Ecol Evol.* **27**, 520–528 (2012).
- 420 35. L. M. Gattepaille, M. Jakobsson, M. G. Blum, Inferring population size changes with  
421 sequence and SNP data: lessons from human bottlenecks. *Heredity.* **110**, 409–419 (2013).
- 422 36. X. Liu, Y.-X. Fu, Exploring population size changes using SNP frequency spectra. *Nat*  
423 *Genet.* **47**, 555–559 (2015).
- 424 37. P. Lesturgie, S. Planes, S. Mona, Coalescence times, life history traits and conservation  
425 concerns: An example from four coastal shark species from the Indo-Pacific. *Mol Ecol*  
426 *Resour.* **22**, 554–566 (2022).
- 427 38. N. R. Golledge *et al.*, The multi-millennial Antarctic commitment to future sea-level rise.  
428 *Nature.* **526**, 421–425 (2015).
- 429 39. M. O. Patterson *et al.*, Orbital forcing of the East Antarctic ice sheet during the Pliocene  
430 and Early Pleistocene. *Nat Geosci.* **7**, 841–847 (2014).
- 431 40. R. M. DeConto *et al.*, The Paris Climate Agreement and future sea-level rise from  
432 Antarctica. *Nature.* **593**, 83–89 (2021).
- 433 41. J. M. Strugnell, A. L. Allcock, P. C. Watts, Closely related octopus species show different  
434 spatial genetic structures in response to the Antarctic seascape. *Ecol Evol.* **7**, 8087–8099  
435 (2017).

- 436 42. J. M. Catchen, A. Amores, P. Hohenlohe, W. Cresko, J. H. Postlethwait, Stacks: Building  
437 and Genotyping Loci De Novo From Short-Read Sequences. *G3: Genes Genomes Genet.*  
438 **1**, 171–182 (2011).
- 439 43. S. Chen, Y. Zhou, Y. Chen, J. Gu, fastp: an ultra-fast all-in-one FASTQ preprocessor.  
440 *Bioinform.* **34**, i884–i890 (2018).
- 441 44. D. E. Wood, S. L. Salzberg, Kraken: ultrafast metagenomic sequence classification using  
442 exact alignments. *Genome Biol.* **15**, R46 (2014).
- 443 45. S. Andrews, FastQC: A Quality Control tool for High Throughput Sequence Data.  
444 *Babraham Institute* (2019).
- 445 46. H. Li, R. Durbin, Fast and accurate short read alignment with Burrows-Wheeler  
446 transform. *Bioinform.* **25**, 1754–1760 (2009).
- 447 47. H. Li *et al.*, The Sequence Alignment/Map format and SAMtools. *Bioinform.* **25**, 2078–  
448 2079 (2009).
- 449 48. Broad Institute, Picard Toolkit. *GitHub repository* (2019).
- 450 49. H. Li, A statistical framework for SNP calling, mutation discovery, association mapping  
451 and population genetical parameter estimation from sequencing data. *Bioinform.* **27**,  
452 2987–2993 (2011).
- 453 50. P. Danecek *et al.*, The variant call format and VCFtools. *Bioinform.* **27**, 2156–2158  
454 (2011).
- 455 51. J. K. Pritchard, M. Stephens, P. Donnelly, Inference of Population Structure Using  
456 Multilocus Genotype Data. *Genetics.* **155**, 945–959 (2000).
- 457 52. J. K. Pickrell, J. K. Pritchard, Inference of Population Splits and Mixtures from Genome-  
458 Wide Allele Frequency Data. *PLoS Genet.* **8**, e1002967 (2012).

- 459 53. P. A. Hohenlohe, S. J. Amish, J. M. Catchen, F. W. Allendorf, G. Luikart, Next-  
460 generation RAD sequencing identifies thousands of SNPs for assessing hybridization  
461 between rainbow and westslope cutthroat trout. *Mol Ecol Resour.* **11**, 117–122 (2011).
- 462 54. R. Gargiulo, T. Kull, M. F. Fay, Effective double-digest RAD sequencing and genotyping  
463 despite large genome size. *Mol Ecol Resour.* **21**, 1037–1055 (2020).
- 464 55. T. Jombart, I. Ahmed, adegenet 1.3-1: New tools for the analysis of genome-wide SNP  
465 data. *Bioinform.* **27**, 3070–3071 (2011).
- 466 56. N. Patterson *et al.*, Ancient admixture in human history. *Genetics.* **192**, 1065–1093  
467 (2012).
- 468 57. X. Liu, Y.-X. Fu, Stairway Plot 2: demographic history inference with folded SNP  
469 frequency spectra. *Genome Biol.* **21**, 280 (2020).
- 470 58. A. P. Ragsdale, C. Moreau, S. Gravel, Genomic inference using diffusion models and the  
471 allele frequency spectrum. *Curr Opin Genet Dev.* **53**, 140–147 (2018).
- 472 59. F. Pina-Martins, D. N. Silva, J. Fino, O. S. Paulo, Structure\_threader: An improved  
473 method for automation and parallelization of programs structure, fastStructure and  
474 MaverickK on multicore CPU systems. *Mol Ecol Resour.* **17**, e268–e274 (2017).
- 475 60. D. A. Earl, B. M. VonHoldt, STRUCTURE HARVESTER: A website and program for  
476 visualizing STRUCTURE output and implementing the Evanno method. *Conserv Genet*  
477 *Resour.* **4**, 359–361 (2012).
- 478 61. B. Gruber *et al.*, dartR: Importing and analysing SNP and silicodart data generated by  
479 genome-wide restriction fragment analysis. *R package version 2.7.2* (2018).
- 480 62. R. R. Fitak, OptM: Estimating the Optimal Number of Migration Edges from Treemix.  
481 *Biol Methods Protoc.* **6**, bpab017 (2021).

- 482 63. B. S. Weir, C. C. Cockerham, Estimating F-Statistics for the Analysis of Population  
483 Structure. *Evolution*. **38**, 1358 (1984).
- 484 64. J. Goudet, hierfstat, a package for r to compute and test hierarchical F-statistics. *Mol Ecol*  
485 *Notes*. **5**, 184–186 (2005).
- 486 65. P. G. Meirmans, GENODIVE version 3.0: Easy□to□use software for the analysis of  
487 genetic data of diploids and polyploids. *Mol Ecol Resour*. **20**, 1126–1131 (2020).
- 488 66. S. Ferrier, G. Manion, J. Elith, K. Richardson, Using generalized dissimilarity modelling  
489 to analyse and predict patterns of beta diversity in regional biodiversity assessment.  
490 *Divers Distrib*. **13**, 252–264 (2007).
- 491 67. M. C. Fitzpatrick, K. Mokany, G. Manion, M. Lisk, S. Ferrier, D. Nieto-Lugilde, gdm:  
492 Generalized Dissimilarity Modeling. *R package version 1.4.2.2*. (2021).
- 493 68. F. G. Vieira, F. Lassalle, T. S. Korneliussen, M. Fumagalli, Improving the estimation of  
494 genetic distances from Next-Generation Sequencing data. *Biol J Linn*. **117**, 139–149  
495 (2016).
- 496 69. J. Oksanen et al., vegan: Community Ecology Package. *R package version 2.5-6* (2013).
- 497 70. M. M. Zweng et al, *World Ocean Atlas 2018, Volume 2: Salinity* (NOAA Atlas NESDIS  
498 82, 2018).
- 499 71. R. A. Locarnini et al., *World Ocean Atlas 2018, Volume 1: Temperature* (NOAA Atlas  
500 NESDIS 75, 2018).
- 501 72. K. Matsuoka et al., Quantarctica, an integrated mapping environment for Antarctica, the  
502 Southern Ocean, and sub-Antarctic islands. *Environ Model Softw*. **140**, 105015 (2021).
- 503 73. W. Revelle, psych: Procedures for Personality and Psychological Research. *R package*  
504 *version 2.3.3* (2020).



- 505 74. S. R. Rintoul, C. W. Hughes, D. Olbers, Chapter 4.6 The Antarctic circumpolar current  
506 system. *Int Geophys.* **77**, 271–302 (2001).
- 507 75. M. Petr, B. Vernot, J. Kelso, admixr—R package for reproducible analyses using  
508 ADMIXTOOLS. *Bioinform.* **35**, 3194–3195 (2019).
- 509 76. R. Schwarz, U. Piatkowski, H. J. T. Hoving, Impact of environmental temperature on the  
510 lifespan of octopods. *Mar Ecol Prog Ser.* **605**, 151–164 (2018).
- 511 77. R. Schwarz, H.-J. Hoving, C. Noever, U. Piatkowski, Life histories of Antarctic incirrate  
512 octopods (Cephalopoda: Octopoda). *PLoS One.* **14**, e0219694 (2019).
- 513 78. B. Robison, B. Seibel, J. Drazen, Deep-sea octopus (*Graneledone boreopacifica*) conducts  
514 the longest-known egg-brooding period of any animal. *PLoS One.* **9**, e103437 (2014).
- 515 79. H. I. Daly, L. S. Peck, Energy balance and cold adaptation in the octopus *Pareledone*  
516 *charcoti*. *J Exp Mar Biol Ecol.* **245**, 197–214 (2000).
- 517 80. B. L. Whitelaw et al., Adaptive venom evolution and toxicity in octopods is driven by  
518 extensive novel gene formation, expansion, and loss. *Gigascience.* **9**, giaa120 (2020).
- 519 81. R. K. Bagley, V. C. Sousa, M. L. Niemiller, C. R. Linnen, History, geography and host  
520 use shape genomewide patterns of genetic variation in the redheaded pine sawfly  
521 (*Neodiprion lecontei*). *Mol Ecol.* **26**, 1022–1044 (2017).
- 522 82. N. Marchi, F. Schlichta, L. Excoffier, Demographic inference. *Curr Biol.* **31**, R276–R279  
523 (2021).
- 524 83. D. A. Marques, K. Lucek, V. C. Sousa, L. Excoffier, O. Seehausen, Admixture between  
525 old lineages facilitated contemporary ecological speciation in Lake Constance stickleback.  
526 *Nat Commun.* **10**, 4240 (2019).

- 527 84. J. Choin et al., Genomic insights into population history and biological adaptation in  
528 Oceania. *Nature*. **592**, 583–589 (2021).
- 529 85. A. Canty, D. Ripley, boot: Bootstrap R (S-Plus) Functions. *R package* (2022).
- 530 86. A. H. Patton et al., Contemporary Demographic Reconstruction Methods Are Robust to  
531 Genome Assembly Quality: A Case Study in Tasmanian Devils. *Mol Biol Evol.* **36**, 2906–  
532 2921 (2019).
- 533 87. T. R. Ranallo-Benavidez, K. S. Jaron, M. C. Schatz, GenomeScope 2.0 and Smudgeplot  
534 for reference-free profiling of polyploid genomes. *Nat Commun.* **11**, 1432 (2020).
- 535 88. M. Kolmogorov, J. Yuan, Y. Lin, P. A. Pevzner, Assembly of long, error-prone reads  
536 using repeat graphs. *Nat Biotechnol.* **37**, 540–546 (2019).
- 537 89. B. J. Walker et al., Pilon: An Integrated Tool for Comprehensive Microbial Variant  
538 Detection and Genome Assembly Improvement. *PLoS One.* **9**, e112963 (2014).
- 539 90. B. Langmead, S. L. Salzberg, Fast gapped-read alignment with Bowtie 2. *Nat Methods.* **9**,  
540 357–359 (2012).
- 541 91. C. A. Souza et al., Efficiency of ddRAD target enriched sequencing across spiny rock  
542 lobster species (Palinuridae: *Jasus*). *Sci Rep.* **7**, 6781 (2017).
- 543 92. J. Catchen, P. A. Hohenlohe, S. Bassham, A. Amores, W. A. Cresko, Stacks: An analysis  
544 tool set for population genomics. *Mol Ecol.* **22**, 3124–3140 (2013).
- 545 93. T. Andermann et al., A Guide to Carrying Out a Phylogenomic Target Sequence Capture  
546 Project. *Front Genet.* **10**, 1407 (2020).
- 547 94. A. F. A. Smit, R. Hubley, P. Green, RepeatMasker Open-4.0 (2015) (available at  
548 <http://www.repeatmasker.org>).

549 95. I. Zarrella et al., The survey and reference assisted assembly of the *Octopus vulgaris*  
550 genome. *Sci Data*. **6**, 13 (2019).

551 96. P. Momigliano, A. B. Florin, J. Merilä, Biases in Demographic Modeling Affect Our  
552 Understanding of Recent Divergence. *Mol Biol Evol*. **38**, 2967–2985 (2021).

553

554

555 **Acknowledgments:**

556 We thank the Australian Antarctic Division (AAD), Alfred Wegener Institute for Polar and  
557 Marine Research (AWI), British Antarctic Survey (BAS), Museum Victoria (MV), National  
558 Institute of Water and Atmospheric Research (NIWA), and G. Jackson for assistance and  
559 samples for genetic analysis. We are grateful to T. Jernfors (University of Jyväskylä) for  
560 sequencing assistance.

561

562 **Funding:**

563 Australian Research Council (ARC) Discovery grant DP190101347 (JMS, NGW, NRG,  
564 TRN)

565 New Zealand Ministry of Business, Innovation and Employment through the Antarctic  
566 Science Platform (ANTA1801) (NRG, TRN)

567 Thomas Davies Research grant (Australian Academy of Science) (JMS)

568 David Pearse bequest (SCYL)

569 Antarctic Science Bursary (SCYL)

- 570 Antarctic PhD student support grant (Antarctic Science Foundation) (SCYL)
- 571 Australasian eResearch Organisations (AeRO) Cloud Grant (SCYL)
- 572 CoSyst grant (JMS, PCW)
- 573 Academy of Finland grant 305532 (PCW)
- 574 Australian Research Council (ARC) SRIEAS Grant SR200100005 Securing Antarctica's
- 575 Environmental Future
- 576 Scientific Committee on Antarctic Research (SCAR) INSTANT programme
- 577
- 578 **Author contributions:**
- 579 Conceptualization: NGW, NRG, TRN, JMS
- 580 Methodology: SCYL, NGW, CNSS, JMS
- 581 Investigation: SCYL
- 582 Formal Analysis: SCYL, IRC
- 583 Visualization: SCYL
- 584 Funding acquisition: SCYL, NGW, NRG, TRN, PCW, JMS
- 585 Resources: PCW, ALA, FCM, KL
- 586 Supervision: NGW, CNSS, JMS
- 587 Writing – original draft: SCYL
- 588 Writing – review & editing: SCYL, NGW, NRG, TRN, PCW, CNSS, IRC, ALA, FCM,
- 589 KL, JMS

590

591 **Competing interests:**

592 Authors declare that they have no competing interests.

593

594 **Data and materials availability:**

595 The ddRADseq data of Southern Ocean octopus generated for target capture bait design is  
596 deposited on National Centre for Biotechnology Information (NCBI) under the BioProject  
597 PRJNA853080, with Sequence Read Archive (SRA) accessions SRR19893055–SRR19893494.

598 The target capture of ddRAD loci data in *Pareledone turqueti* is deposited under the BioProject  
599 PRJNA853871, with SRA accessions SRR19892485–SRR19892582. The draft partial genome  
600 of *P. turqueti* is available for download from <https://www.marine-omics.net/resources/>. All  
601 software used for data analyses in this study is publicly available. Detailed methods including  
602 scripts and command used to perform all analyses are provided at  
603 [https://github.com/sallycylau/WAIS\\_turqueti](https://github.com/sallycylau/WAIS_turqueti).

604

605 **Supplementary Materials:**

606 Materials and Methods

607 Supplementary Text

608 Figs. S1 to S26

609 Tables S1 to S13

610 Data S1 to S2

611 References (41–96)
