# Supplementary material for: Genomic evidence for West Antarctic Ice Sheet collapse during the Last Interglacial
Source: bioRxiv or medRxiv preprint supplement (doi:10.1101/2023.01.29.525778), 2023-12-20
Supplement: Supplementary file [file media-1.pdf]

1  
2  
3  
4  
5  
6  
7  
8  
9  
10  
11  
12  
13  
14  
15  
16  
17  
18  
19

# Supplementary Materials for

## Genomic evidence for West Antarctic Ice Sheet collapse during the Last Interglacial Period

Sally C. Y. Lau, Nerida G. Wilson, Nicholas R. Golledge, Tim R. Naish, Phillip C. Watts, Catarina N. S. Silva, Ira R. Cooke, A. Louise Allcock, Felix C. Mark, Katrin Linse, Jan M. Strugnell

Correspondence to: [cheukying.lau@jcu.edu.au](mailto:cheukying.lau@jcu.edu.au)

**This PDF file includes:**

- Materials and Methods
- Supplementary Text
- Figs. S1 to S10
- Tables S1 to S5
- Data S1 to S2

## 20 **Materials and Methods**

21

### 22 Target capture sequencing of ddRAD loci in *P. turqueti*

23

24 Tissue samples of *Pareledone turqueti* (n = 96) collected around the Antarctic continental shelf  
25 and Antarctic islands (Fig. 1), between the depths of 102–1342 m, were sequenced with target  
26 capture probes designed from previously identified ddRADseq loci (Supplementary Text; Data  
27 S1-S2). Two outgroup species (*P. aequipapillae*; ID: 44064\_1 and *P. cornuta*; ID: CT931)  
28 collected from the Ross Sea and Adélie Land were also included in the target capture dataset. For  
29 target capture sequencing, we did not include the standard DNA shearing step as these samples  
30 had already been identified as having degraded DNA. Libraries with unique index adapters were  
31 built and pooled into single capture reactions (six libraries per capture). All libraries were  
32 enriched in capture reactions using myBaits® following the manufacturer's protocol and the  
33 resulting capture reactions were sequenced on Illumina NovaSeq S4 flow cells with 150 bp  
34 paired end reads. Sixty-three *P. turqueti* samples examined in this study, as well as the two  
35 outgroup samples, were previously included in studies that analysed Cytochrome c oxidase  
36 subunit I (COI) and microsatellite data (23, 36).

37

### 38 Target capture data processing, reads mapping and variant calling

39

40 Raw target capture reads were demultiplexed with adapters and barcodes were removed using  
41 *process\_shortreads* in *Stacks* v2.3d (37). Reads with phred quality less than 20 ( $Q < 20$ ) were  
42 also discarded, and polyG in read tails were trimmed, using *fastp* v0.20 (38). Potential  
43 contaminants (human and microorganisms) were identified using *Kraken* v1.0 (39) and  
44 sequences that were classified under the contaminant database (MiniKraken 8GB 2017) were  
45 removed. Cleaned and trimmed reads were then checked for quality using *fastQC* v0.11.7 (40).

46

47 Cleaned target capture reads were mapped to the consensus sequences of ddRAD loci that were  
48 used for bait design using *bwa* v0.7 (51) *mem* with default parameters (41). *Samtools* v1.7 (42)  
49 was used to sort alignments by coordinates, and PCR duplicates were marked and removed using  
50 *picard* v2.18.1 (43). Sites were called across all samples using *bcftools* v1.7 *mpileup* (44). Then,  
51 indels and samples with high missing data on an individual basis ( $> 80\%$ ) were removed, and  
52 only sites with Phred quality score higher than 30 were kept ( $--minQ\ 30$ ). Further SNP filtering  
53 was performed differently based on the assumptions of each type of data analysis (as indicated  
54 below) using *VCFtools* v0.1.16 (45).

55

56 For the inference of population structure and relationship at a circumpolar scale (Principal  
57 Component Analysis [PCA], *Structure* v.2.3.4 (46) and *TreeMix* v.1.13 (47)), we included all *P.*  
58 *turqueti* samples (n = 96). We reduced the dataset to 5,188 biallelic unlinked SNPs, filtered  
59 based on the following steps. Sites with mean read depth of less than 16x (=average depth  
60 (48.2x) /3) and greater than 96x (=2\*average depth) were removed (using  $--min-meanDP\ 16$  and  
61  $--max-meanDP\ 96$ ). Only biallelic sites were kept ( $--min-alleles\ 2$ ,  $--max-alleles\ 2$ ). Sites were  
62 kept if present in at least 50% of all samples ( $--max-missing\ 0.5$ ). Sites with a minor allele  
63 frequency of at least 5% were kept ( $--maf\ 0.05$ ). To remove sites that likely belonged to  
64 paralogous loci and therefore artificial SNPs, only sites with a maximum observed  
65 heterozygosity of 0.5 were kept (48, 49), identified via the R package *adegenet* v2.1.3 (50).

66 Lastly, only one site per locus was kept (--thin 1000; an arbitrary number larger than the longest  
67 contig, in basepair [bp] in the bait set). For the inference of admixture (*AdmixTools* v7.0.1 (51)),  
68 120,857 biallelic SNPs were kept in the dataset. Instead of filtering by minor allele frequency,  
69 SNPs with a minor allele count of at least 1 were kept; and all SNPs per locus were kept.

70  
71 For demographic modelling using *fastsimcoal* v2.6 (30), we reduced the dataset to 171,061  
72 unlinked sites (including 115,741 biallelic SNPs) filtered based on the following steps. Sites with  
73 mean read depth of less than 17x and greater than 103x were removed (--min-meanDP 17, --  
74 max-meanDP 103). Only sites with a maximum of two alleles were kept (--min-alleles 1, --max-  
75 alleles 2). Sites were kept if present at least in 50% of all samples (--max-missing 0.5). Only sites  
76 with a maximum observed heterozygosity of 0.7 were kept (48, 49), identified via the R package  
77 *adegenet*. Next, we randomly resampled a fixed number of diploid genotypes from each locality  
78 (WS: 15, AS: 4, RS: 8, EA: 5) to a dataset without missing data while maximising the number of  
79 SNPs and genotypes across localities, using a custom python script  
80 *fastsimcoal/sampleKgenotypesPerPop.py*. Then, within each RAD locus, SNPs in linkage  
81 disequilibrium were removed based on  $r^2 > 0.95$ , identified via --geno-r2 (--min-r2 0.95),  
82 following Marques et al. (2019) (52). We also randomly removed a number of monomorphic  
83 sites proportional to the retained number of SNPs after linkage pruning.

84  
85 For inferring past population size change (*StairwayPlot* v2 (34, 53)), we reduced the dataset to  
86 106,115 biallelic SNPs. Sites with mean read depth of less than 17x and greater than 103x were  
87 removed (--min-meanDP 17, --max-meanDP 103). Only biallelic sites were kept (--min-alleles 2,  
88 --max-alleles 2). Sites were kept if present at least in 50% of all samples (--max-missing 0.5).  
89 Sites with a minor allele count of at least 1 were kept. Lastly, only sites with a maximum  
90 observed heterozygosity of 0.7 were kept (48, 49), identified via the R package *adegenet*.

91  
92 For *AdmixTools*, *fastsimcoal* and *StairwayPlot*, we included *P. turqueti* samples (in diploids)  
93 from WS (n = 18), AS (n = 4), RS (n = 10) and EA (n = 5; excluding Adélie Land) (Data S1).  
94 Samples from SHE (n = 13), Shag Rocks (n = 9) and South Georgia (n = 19) were also kept for  
95 *AdmixTools*. EA localities included Prydz Bay and East Casey Station; we excluded Adélie Land  
96 from EA samples as *Structure*, PCA and *TreeMix* indicated uniquely strong admixture between  
97 Adélie Land and RS in *P. turqueti*. The observed Adélie Land - RS connectivity could be linked  
98 to contemporary regional currents, thus confounding the interpretation of historical trans-West  
99 Antarctic connectivity while considering the effects of circumpolar gene flow using EA samples.  
100 Filtering thresholds were relaxed in order to retain a maximum number of informative SNPs  
101 within the scope of each model's assumptions, as the signals of true demographic events would  
102 be much stronger than a few erroneous loci (49).

### 103 104 Genetic structure of *P. turqueti*

105  
106 To visualise the overall genetic structure of *P. turqueti* at a circumpolar scale, PCA was  
107 performed using *adegenet* across all samples. Individual admixture proportions were also  
108 estimated via *Structure* (46). *Structure* was run between  $K = 1$  and 10, with ten replicates per  $K$   
109 via *Structure\_threader* (54). Each run was performed with 500,000 iterations and burn-in of  
110 100,000. The meaningful  $K$  was evaluated based on the highest mean log likelihood [mean  
111  $\text{LnP}(K)$ ] and  $\Delta K$  statistics using *Structure Harvester* (55).

112  
113  
114  
115  
116  
117  
118  
119  
120  
121  
122  
123  
124  
125  
126  
127  
128  
129  
130  
131  
132  
133  
134  
135  
136  
137  
138  
139  
140  
141  
142  
143  
144  
145  
146  
147  
148  
149  
150  
151  
152  
153  
154  
155  
156  
157

### Allele frequency correlations between seaway populations

To further explore whether there is direct admixture between seaway populations despite circumpolar gene flow driven by the Antarctic Circumpolar Current (ACC) and Antarctic Slope Current (ASC), outgroup- $f_3$ -statistic (29) and  $D$ -statistic (in the form of BABA-ABBA) (28) were calculated using *AdmixTools* (51) via *admixr* (56). Both tests were constructed based on population trees and were performed between WS, AS and RS populations, with respect to locations (SHE and EA) situated in between WS, AS and RS. For both tests, samples from Shag Rocks and South Georgia were combined and considered as an outgroup population, since *Structure* analysis indicates samples from this region (Shag Rocks + South Georgia) exhibit genetic isolation. Based on mitochondrial data, *P. turqueti* from Shag Rocks and South Georgia are also considered a distinct lineage diverged from Antarctic continental shelf lineage in the mid-Pliocene (23).

The  $D$ -statistic examines whether there is excess allele sharing between two of the three ingroup populations, with respect to a common outgroup population. We considered a) whether there was a partial collapse across WAIS which would result in connectivity between WS and AS, and b) whether there was also a full collapse across WAIS which would result connectivity between WS and RS. When testing for excess allele sharing between WS and AS or RS, considering SHE or EA, we computed the  $D$ -statistic of the following form:  $D(\text{seaway population, circumpolar current population, WS, outgroup})$ , where seaway population represented AS or RS, and circumpolar current population represented those would receive potential migration via circumpolar currents (i.e. SHE or EA).

The outgroup- $f_3$ -statistic examines the branch length between pairs of populations with respect to a common outgroup population. We computed the outgroup- $f_3$ -statistic of the following form:  $f_3(\text{Outgroup; A, B})$ , where A and B represented pairs of population between WS, AS, RS, SHE and EA.

For  $D$ -statistics and outgroup- $f_3$ -statistics, standard errors were computed with block-jackknife procedures, with blocks representing the length of RAD loci. Z-score values  $> 3$  or  $< -3$  were considered significantly different from 0 for both tests. Tabulated  $D$ -statistics and outgroup- $f_3$ -statistics outputs are presented in table S2-S3.

### SFS based inferences – mutation rate and generation time

For site frequency spectrum (SFS)-based inferences (*StairwayPlot*, *fastsimcoal*) for *P. turqueti*, a generation time of 12 years was assumed based on the species' estimated life span (57, 58), as female octopods (including cold water deep-sea octopuses) are known to exhibit a single reproductive period followed by death (57, 59). A mutation rate of  $2.4 \times 10^{-9}$  per site per generation was used based on the genome-wide mutation rate estimated for the Southern blue-ringed octopus (*Hapalochlaena maculosa*) (60).

### Past population size changes

158 Past effective population size ( $N_e$ ) changes within WS, AS, RS and EA populations of *P. turqueti*  
159 were reconstructed using *StairwayPlot*. *StairwayPlot* is a model-flexible method that infers past  
160 population size changes over specific points in a genealogy through 1-dimensional SFS (1d-  
161 SFS). *StairwayPlot* was chosen to further explore past population size changes instead of  
162 demographic models (e.g. *fastsimcoal*) as it is not constrained by a-priori information, which can  
163 in turn explore a larger model space than parametrised demographic models (34). *StairwayPlot* is  
164 also known to reconstruct recent population size changes with high accuracy comparable to  
165 whole-genome Sequentially Markovian Coalescent (SMC)-based methods (61). For  
166 *StairwayPlot*, we first polarised SNPs using outgroup species (*P. aequipapillae* and *P. cornuta*).  
167 Then, unfolded 1d-SFS per population was generated via `easySFS.py`  
168 (<https://github.com/isaacovercast/easySFS#easysfs>). For *StairwayPlot*, we did not project the  
169 spectra downward as the number of segregating sites are already maximised at existing sample  
170 size per population (based on `easySFS`). Total sequence length was defined as the length of  
171 genome explored after SNP filtering (= number of loci x length of locus). The percentage of sites  
172 used for training was 67% and the number of random break points for each run were  $(n_{seq}-2)/4$ ,  
173  $(n_{seq}-2)/2$ ,  $(n_{seq}-2)*3/4$ ,  $n_{seq}-2$  based on default values. Each run was performed with a random  
174 starting seed.

## 175 Demographic modelling

176 We used demographic modelling to explicitly evaluate whether there were ancient migrations  
177 linking to no, partial or complete collapse of the WAIS preceding modern-day gene flow in *P.*  
178 *turqueti*. Demographic modelling was performed using the coalescent simulations-based  
179 framework in *fastsimcoal*. For demographic modelling, we only considered WS, AS, RS and EA  
180 in our models (4-population model), as the model evaluation is based on composite likelihoods  
181 which requires a single multidimensional SFS (i.e. four dimensional (4d)-SFS in this study). In a  
182 multidimensional SFS with  $> 4$  populations, the number of zero entries will increase which  
183 makes it challenging for *fastsimcoal* to fit the observed data (62). EA samples are chosen to be  
184 included in the models instead of SHE as samples from across EA are considered of particular  
185 importance in representing clear signatures of circumpolar gene flow (16), because they are  
186 geographically separated from the WAIS but are also directly influenced by both the ACC and  
187 ASC.

188 Because there are an unlimited number of demographic models to be explored, especially when a  
189 high number of populations are incorporated (i.e. four in this study), we used a hypothesis  
190 driven, hierarchical approach to reconstruct simple, contrasting demographic models involving  
191 no, partial or complete historical collapse of WAIS using *fastsimcoal* (fig. S3). We explored  
192 simpler models and subsequently added more complex parameters to improve the fit to the  
193 observed data, as recommended by Marchi et al. (2021) (63), with a hierarchical framework  
194 constructed following Marques et al. (2019) (52). First, we compared six different models  
195 comprising different WAIS collapse scenarios (no, partial or complete collapse), while  
196 modelling contemporary gene flow driven by the ACC (clockwise) (step 1). These six models  
197 had the following conditions: 1) continuous circumpolar gene flow since population divergence  
198 (no collapse scenario), 2) strict isolation followed by clockwise circumpolar gene flow (no  
199 collapse scenario), 3) gene flow between WS-AS followed by clockwise circumpolar gene flow  
200 (partial collapse scenario), 4) gene flow between AS-RS followed by clockwise circumpolar

204 gene flow (partial collapse scenario), 5) gene flow between WS-RS followed by clockwise  
205 circumpolar gene flow (full collapse scenario), and 6) gene flow between WS-AS-RS followed  
206 by clockwise circumpolar gene flow (full collapse scenario). To infer more ecologically realistic  
207 scenarios, we considered complex models (step 2) that included contemporary gene flow  
208 following both the directionalities of the ACC (clockwise) and ASC (counter-clockwise). At step  
209 2, we also considered two additional models with the following conditions: (7) gene flow  
210 between WS-AS and WS-RS followed by clockwise and counter-clockwise circumpolar gene  
211 flow, and (8) gene flow between AS-RS and WS-RS followed by clockwise and counter-  
212 clockwise circumpolar gene flow (fig. S3-S4).

213

#### 214 Model run and selection

215

216 For *fastsimcoal* analyses, we first polarised SNPs using outgroup species (*P. aequipapillae* and  
217 *P. cornuta*). Then, we converted the datasets into unfolded multidimensional SFS for model  
218 evaluation using the python script `fastsimcoal/vcf2sfs.py` ([https://github.com/marqueda/SFS-  
219 scripts/blob/master/vcf2sfs.py](https://github.com/marqueda/SFS-scripts/blob/master/vcf2sfs.py)). For each model, we performed 100 independent runs of random  
220 starting parameter combinations, with each run pooling SFS entries with fewer than 10 SNPs in  
221 order to avoid overfitting (-C 10), consisting of 40 ECM optimisation cycles and using 500,000  
222 coalescent simulations. We then re-estimated the likelihoods of each model, based on the  
223 maximum-likelihood estimates obtained from the best run (\*\_maxL.par), also using 100  
224 independent runs and 500,000 coalescent simulations. The re-calculated likelihoods should  
225 closely approximate the true likelihoods as they are maximised under each model scenario, and  
226 the distribution of the re-calculated likelihoods should reflect the inherent stochasticity of  
227 coalescent simulations (30). We also introduced upper bound for the parameter T1 (divergence  
228 time estimate) as the model runs were detecting ancestral signals beyond the species  
229 evolutionary history, thus likely to confound estimation of recent parameter estimates (64).  
230 Introducing an upper bound of divergence estimates would also reduce the parameter space  
231 within the time period of interest (i.e. history since speciation) in complex models (52, 65). The  
232 upper bound of T1 was constrained by the known conservative (median) estimate of species  
233 divergence time, which was 4 million years ago for *P. turqueti* (23). This divergence estimate  
234 was chosen as it was calculated using different markers than RAD loci; these divergence times  
235 were estimated using mitochondrial data of *P. turqueti* (23).

236

237 Model fits were evaluated based on the lowest deltaLikelihood, Akaike's information criterion  
238 (AIC) and AIC weights. We also visualised the distributions of re-estimated AIC values in order  
239 to assess the variance between model fitting runs. For the final best model, we visually inspected  
240 the fit of the observed versus expected SFS, as well as the residuals in model fitting, to evaluate  
241 whether the final selected model is approximated to the observed data (Supplementary Text).

242

243 The 95% confidence intervals (CI) of parameters of the best model were calculated using 100  
244 replicates of non-parametric block-bootstrapped joint pairwise 2d-SFSs. The 100 bootstrapped  
245 replicates were generated via `vcf2sfs.py`. The length of each block was defined as the length of  
246 RAD locus. Within each replicate, the parameters under the best model scenario were estimated  
247 with 100 independent runs with 500,000 coalescent simulations, pooling SFS entries with fewer  
248 than 10 SNPs (-C 10), and 40 ECM optimisation cycles. The parameter estimates of the best run

249 from each bootstrapped replicate were used to compute the confidence interval, which was  
250 calculated via empirical percentiles.  
251

## 252 **Supplementary Text**

253

### 254 Discovery of ddRADseq loci for target capture sequencing

255

#### 256 *Draft reference genome sequencing and assembly*

257

258 A draft reference genome of *P. turqueti* was sequenced from two individuals collected from  
259 Elephant Island (ID: PT186) and the South Orkney Islands (ID: PT244) (Data S2). Total  
260 genomic DNA of both of these samples (gDNA) was extracted using a DNeasy Blood and Tissue  
261 Kit (Qiagen), following the manufacturer's protocol. Sample PT186 was sequenced on PacBio  
262 Sequel system (20 K insert library) with three cells which generated a total read volume of 28  
263 Gigabase pairs (Gbp). Sample PT244 was sequenced using both 200 base pair (bp) and 500 bp  
264 insert libraries on an Illumina HiSeq X ten in 150 bp paired-end mode. One flow cell was used  
265 for the 200 bp library and two flow cells for the 500 bp. Genome size was estimated at between  
266 3.7 Gb and 8.1 Gb based on the Illumina reads using Genomescope 2.0 (66). Genome assembly  
267 was performed with Redbean v2.4 (67) using the long-reads from PT186 and then error corrected  
268 using reads from PT244 with Pilon (68). The final assembly had a total length of 517 Mb from  
269 38,290 contigs with the largest contig of 146 Kb and N50 of 16.9 Kb. It is available for  
270 download from <https://www.marine-omics.net/resources/> (Direct download link from host:  
271 <https://cloudstor.aarnet.edu.au/plus/s/opg7MQ0tVHtCmMN/download>). We found that the  
272 mapping rate of Illumina raw reads from sample PT244 to the polished assembly was high  
273 (~92%) indicating that despite the small size of this assembly it captured the vast majority of  
274 unique genomic sequence. Nevertheless, the small assembly size compared with estimated  
275 genome size suggests that the assembly is highly incomplete, probably due to the collapse of  
276 many repetitive regions. We therefore used it purely for the purpose of identifying ddRAD and  
277 target capture loci likely to fall within repeat regions.

278

#### 279 *ddRAD library preparation, sequencing and SNP calling*

280

281 As part of a wider effort to perform ddRAD sequencing across different Southern Ocean octopus  
282 species, 440 Southern Ocean octopus specimens (*Adelieledone polymorpha*, *A. adeliensis*,  
283 *Adelieledone* sp., *Pareledone turqueti*, *P. aequipapillae*, *P. prydzensis*, *P. cornuta*, *P. subtilis*,  
284 *Pareledone* sp., *Megaleledone setebos* and *Graneledone* sp.) (Data S2) were selected for  
285 ddRADseq library preparation and sequencing. ddRADseq libraries were prepared at the Beijing  
286 Genomics Institute (BGI) Tech Solutions Co. Limited (Hong Kong) following Peterson et al.  
287 (25). Briefly, genomic DNA of each sample was digested with MseI and EcoRI restriction  
288 enzymes, ligated with barcoded adapters, pooled digested ligated fragments were size selected  
289 using Blue Pippin and divided into libraries. Twenty-two technical replicates were also included  
290 across libraries (see Data S2). All libraries were amplified via PCR using indexed primers and  
291 sequenced on a HiSeq X ten (at BGI).

292

293 Raw ddRAD reads were demultiplexed with barcodes and adapters removed by BGI using their  
294 in-house pipeline. Reads with phred quality less than 20 ( $Q < 20$ ) were also discarded using fastp  
295 v0.20 (38). Potential contaminants (human and microorganisms) were identified using Kraken  
296 v1.0 (39), and reads that matched those of the contaminant database were removed. Cleaned and  
297 trimmed reads were checked for quality using fastQC v0.11.7 (40), and mapped to the draft  
298 genome of *P. turqueti* using bowtie2 v2.3.4.1 (69) (--very-sensitive-local). Local alignment (--  
299 very-sensitive-local) was used, following Souza et al. (70), since the ddRADseq dataset contains  
300 a wide variety of Southern Ocean octopod taxa that may contain structural rearrangements or  
301 variants at either ends of reads that are different from the reference (*P. turqueti*). Samtools v1.7  
302 (42) was used to sort the alignments (BAM files) by coordinates. ddRAD loci were built from  
303 aligned and sorted reads, and SNPs were called, using the Stacks v2.3d gstacks module with  
304 default settings (37, 71).

305

### 306 *ddRAD loci discovery for target capture sequencing of P. turqueti*

307

308 Initial assessment of raw genotype calls from Stacks indicated 155 out of 440 Southern Ocean  
309 octopus samples exhibited a high amount of missing data ( $> 80\%$ ), with 92 out of these 155  
310 samples identified as *P. turqueti*. Samples with high levels of missing data were likely degraded  
311 due to long term storage. Then, a target capture bait set was designed with the intention of  
312 capturing a high proportion of the same loci in the degraded samples that were included in the  
313 ddRADseq (non-degraded) dataset. Loci discovery for this purpose was performed using a total  
314 of 285 samples comprising those with missing data less than 80% and included samples from the  
315 following species: *A. adeliwana*, *A. polymorpha*, *Adelieledone* sp., *P. turqueti*, *P. aequipapillae*,  
316 *Pareledone* sp., *M. setebos*, *Graneledone* sp. (Data S2). The Stacks population module was then  
317 performed to retain sites that were present in 50% of the remaining samples (-R 0.5) with at least  
318 a minor allele frequency of 0.01 (- min-maf 0.01), which resulted in 31,142 loci retained.  
319 Discriminant analysis of principal components (DAPC) was performed via the R package  
320 adegenet v2.1.3 (50) to visualise potential batch effects between libraries (no batch effect was  
321 found). When the technical replicates were paired together, the replicate with the highest amount  
322 of missing data was removed.

323

324 The consensus fasta sequences of the 31,142 loci were then aligned back to the reference *P.*  
325 *turqueti* genome using bowtie2 with end-to-end alignment (--sensitive). Of the 31,142 loci, 8,942  
326 loci were aligned back to the genome exactly once, while 20,123 aligned multiple times. Only  
327 the 8,942 uniquely aligning loci were retained for target capture bait design, to avoid paralogous  
328 genes which can compromise phylogenetic inference (72).

329

### 330 *Bait design for the target capture sequencing of ddRAD loci in degraded P. turqueti samples*

331

332 The consensus sequences of the filtered ddRAD loci ( $n = 8,942$ ) were used for custom  
333 biotinylated RNA bait manufacturing at Arbor Bioscience (Ann Arbor, MI, USA). Input  
334 sequences were soft-masked (0.5%) for simple repeats and low-complexity regions using Repeat  
335 Masker (73), and candidate bait sequences were designed based on bait length (70 nucleotides  
336 per bait) and 3 X tiling per locus. Candidate baits were removed if, 1) they were greater than  
337 25% soft-masked for simple repeats, 2) had hits to regions of the *P. turqueti* genome (this study)  
338 and the common octopus *Octopus vulgaris* genome (GenBank assembly accession:



339 GCA\_003957725.1) (74) that were greater than 25% soft-masked, or 3) failed Arbor Bioscience  
340 in-house moderate Basic Local Alignment Search Tool (BLAST) parameters, which take into  
341 account the BLAST hit for a bait and predicted melting temperatures. The final myBaits© (Arbor  
342 Bioscience) panel contained 86,422 baits that targeted 8,877 ddRAD loci with at least one bait.

343

#### 344 Extended results of demographic modelling

345

#### 346 *Demographic modelling of P. turqueti*

347

348 We used a hierarchical approach to build a demographic model of Weddell Sea (WS), Amundsen  
349 Sea (AS), Ross Sea (RS) and East Antarctica (EA) populations in *P. turqueti*. We started from  
350 simple models (step 1; models only including contemporary gene flow flowing in the direction of  
351 the Antarctic Circumpolar Current [ACC]) and then increased model complexity (step 2; models  
352 including contemporary gene flow flowing in the direction of the ACC and the Antarctic Slope  
353 Current [ASC]) (fig. S3-S4). At step 1, a limited differentiation between maximised Akaike  
354 information criterion (AIC) values (median between 807539 and 807574) was observed across  
355 similar competing scenarios (psc\_fulcol1, psc\_nocol and psc\_parcol) (table S4, fig. S5-S6).  
356 Therefore, we further evaluated step 2 models to increase complexity and to model more  
357 ecologically realistic scenarios. After incorporating competing scenarios of historical WAIS  
358 configurations and contemporary gene flow driven by the ACC and ASC, the “psccc\_full\_coll”  
359 model was identified as the best model (table S5, fig. S7-S8).

360

361 Overall, we obtained a very good fit of the expected and the observed site-frequency-spectrum  
362 (SFS) for *P. turqueti* (fig. S9). Among the entries of the one-dimensional (1D)-SFSs (fig. S10),  
363 there is a good fit of the expected SFS for the entries with more SNPs, with the fit of the  
364 expected SFS gradually getting poorer for entries with fewer SNPs. The poorest fits of the  
365 expected SFS were observed for the entries with a high number of derived alleles in some  
366 populations (fig. S9). This is expected as the modelled demographic scenarios aim to test simple  
367 contrasting hypothesised scenarios of whether there was no, partial or complete historical  
368 Western Antarctic Ice Sheet (WAIS) collapse, as well as accounting for the parameters of  
369 circumpolar gene flow, across four populations (WS, AS, RS and EA). We did not model for  
370 detailed demographic changes for each population in order to avoid over-parameterising the  
371 models. The unmodelled high number of derived alleles in some populations likely represent  
372 unmodelled population-level changes throughout the Quaternary glacial-interglacial cycles.

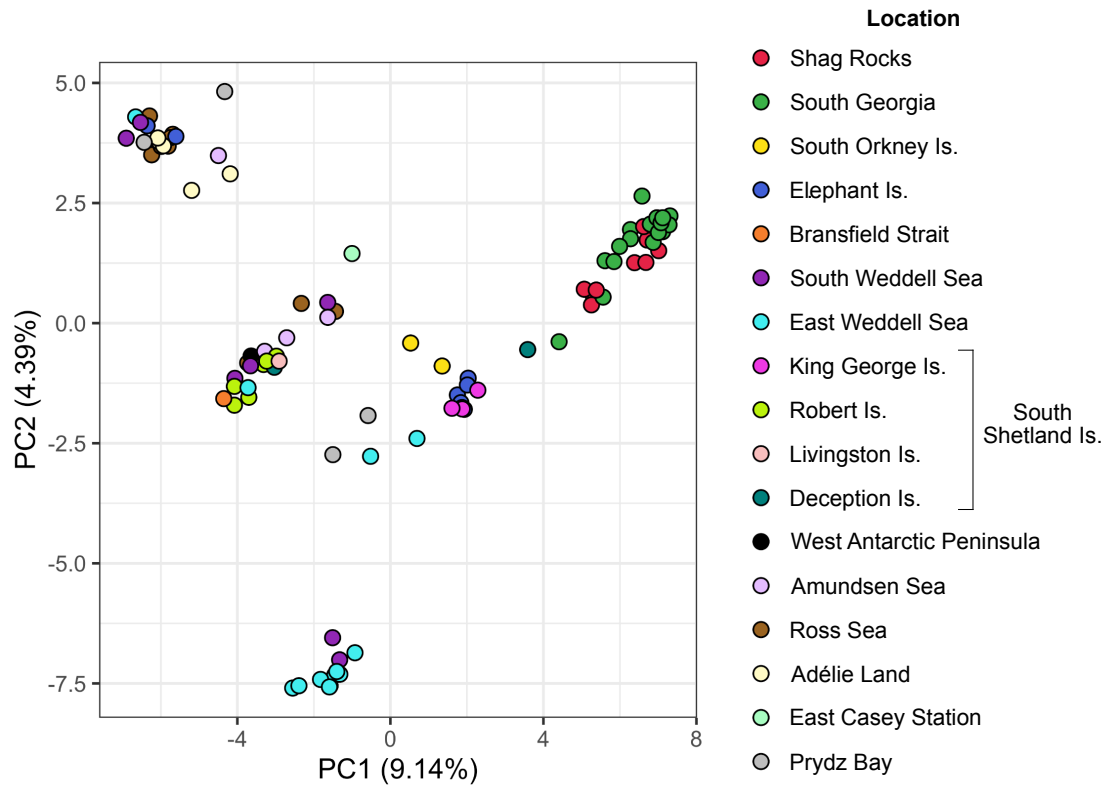

373  
 374 **Fig. S1.**  
 375 **Principal component analysis (PCA) of *Paredone turqueti*.** Samples are separated by  
 376 geographical locations showing the genetic variation on the first two PC axes.  
 377  
 378  
 379

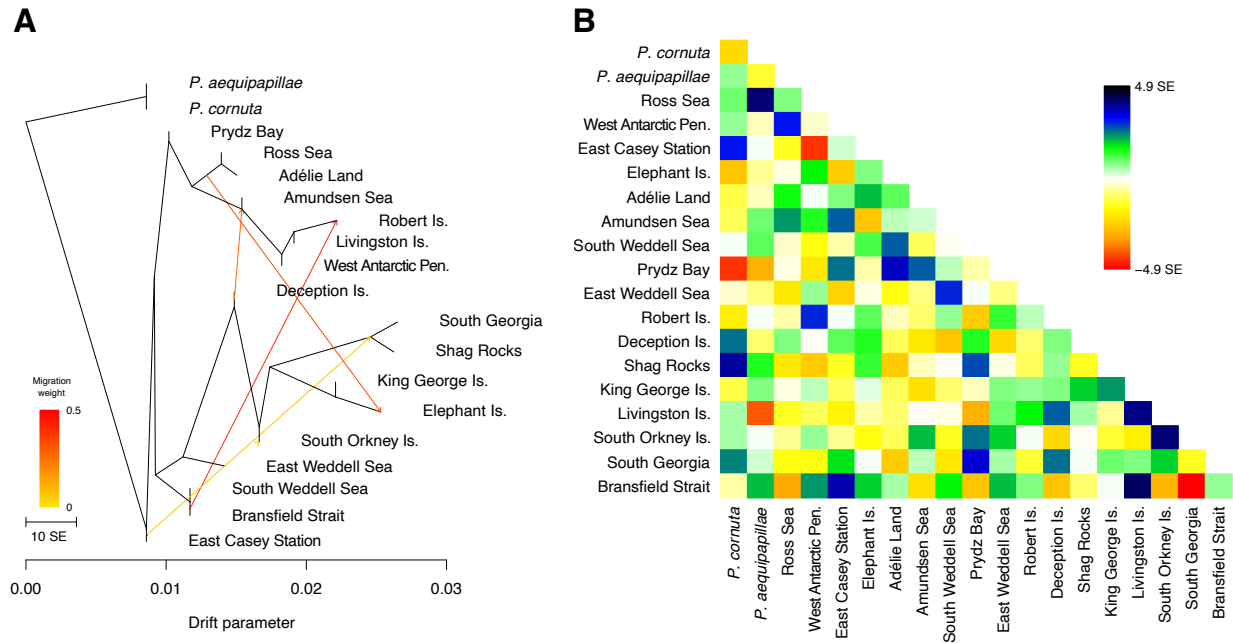

380

381 **Fig. S2.**

382 ***TreeMix* maximum likelihood (ML) tree of *Pareledone turqueti* rooted with outgroups.**

383 Horizontal branch lengths are proportional to the amount of genetic drift that has occurred on  
 384 each branch. Migration edge is coloured based on migration weight, which corresponds to the %  
 385 ancestry in the sink population originated from the source population. Only the edges found to be  
 386 significant by jackknife significance tests were presented. (A) ML tree of *P. turqueti*. Terminal  
 387 nodes are subdivided based on distinct geographical locations. (B) Residual matrix visualising  
 388 the fit of the *TreeMix* modelled allele frequencies to the observed allele frequencies. Residuals  
 389 are shown as the standard error (SE) of the covariance deviation. Positive residuals (> 0)  
 390 represent that the *TreeMix* model underestimated the observed covariance, and that the paired  
 391 populations are more closely related than modelled. Negative residuals (< 0) represent that the  
 392 *TreeMix* model overestimated the observed covariance, and that the paired populations are more  
 393 distant than modelled. However, negative residuals are also products of positive residuals being  
 394 present in the matrix. Here the range of the residuals are small (up to  $\pm 4.9$  SE) and most are  
 395 close to zero between paired localities, suggesting that the concluded *TreeMix* models were  
 396 overall a good fit to the observed data.

■ Weddell Sea   
 ■ Ross Sea   
 ■ Amundsen Sea   
 ■ East Antarctica

**A Step 1: WAIS collapse scenarios + contemporary ACC gene flow**

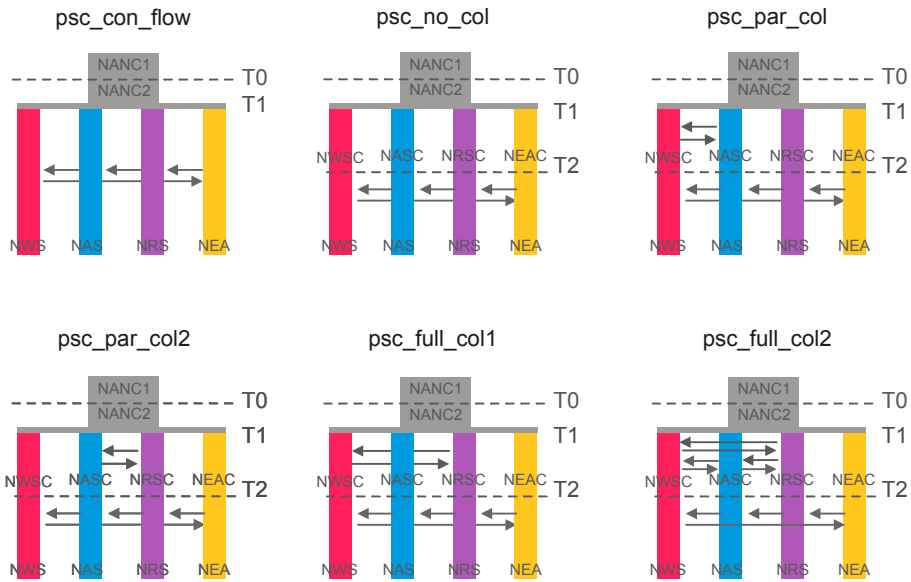

**B Step 2: WAIS collapse scenarios + contemporary ACC and ASC gene flow**

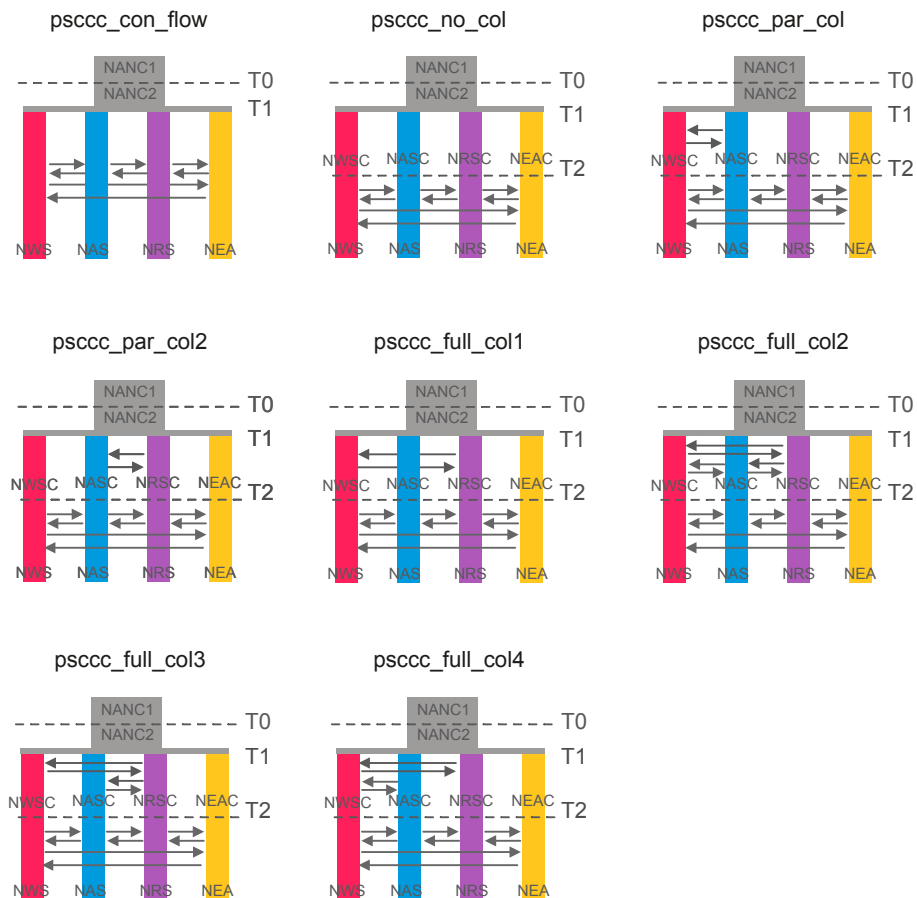

398 **Fig. S3.**  
399 **Hierarchical demographic modelling approach to deduce signatures of historical trans-**  
400 **West Antarctic seaways connectivity in *Pareledone turqueti*.** Simple, contrasting scenarios of  
401 past West Antarctic Ice Sheet (WAIS) configurations were compared. **(A)** For the models at step  
402 1, it was hypothesised that since population divergence WS, AS, RS may have experienced any,  
403 partial, or complete connectivity, followed by modern circumpolar gene flow linking WS, AS,  
404 RS and EA. The possibilities of population size change over each time interval were also  
405 considered. For circumpolar gene flow, simpler models which only consisted of the directionality  
406 of the Antarctic Circumpolar Current (ACC; clockwise flowing) were performed. **(B)** To  
407 increase model complexity, step 2 models were further performed, which considered more  
408 complex models that included both directionalities of the ACC and Antarctic Slope Current  
409 (ASC; counter-clockwise flowing). Each model is labelled by the text above it. Text within each  
410 model denotes the parameter labels associated with the population size change at a particular  
411 interval (Nxxx), as well as the timing of modelled events (Tx). Dashed lines represent a distinct  
412 time interval. Arrows represent migration between populations.

**A Step 1: WAIS collapse scenarios + contemporary ACC gene flow**

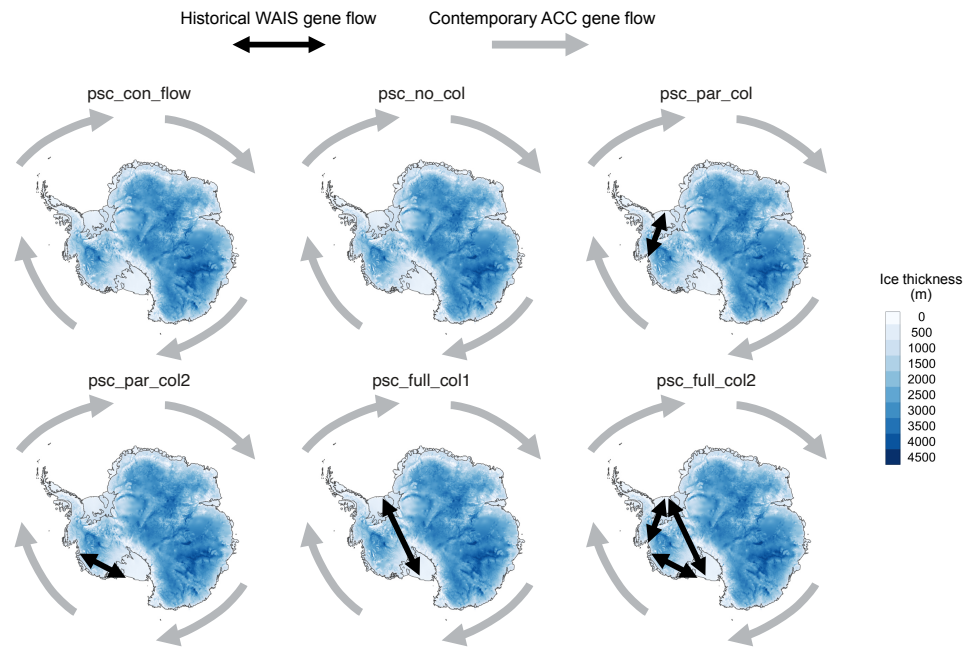

**B Step 2: WAIS collapse scenarios + contemporary ACC & ASC gene flow**

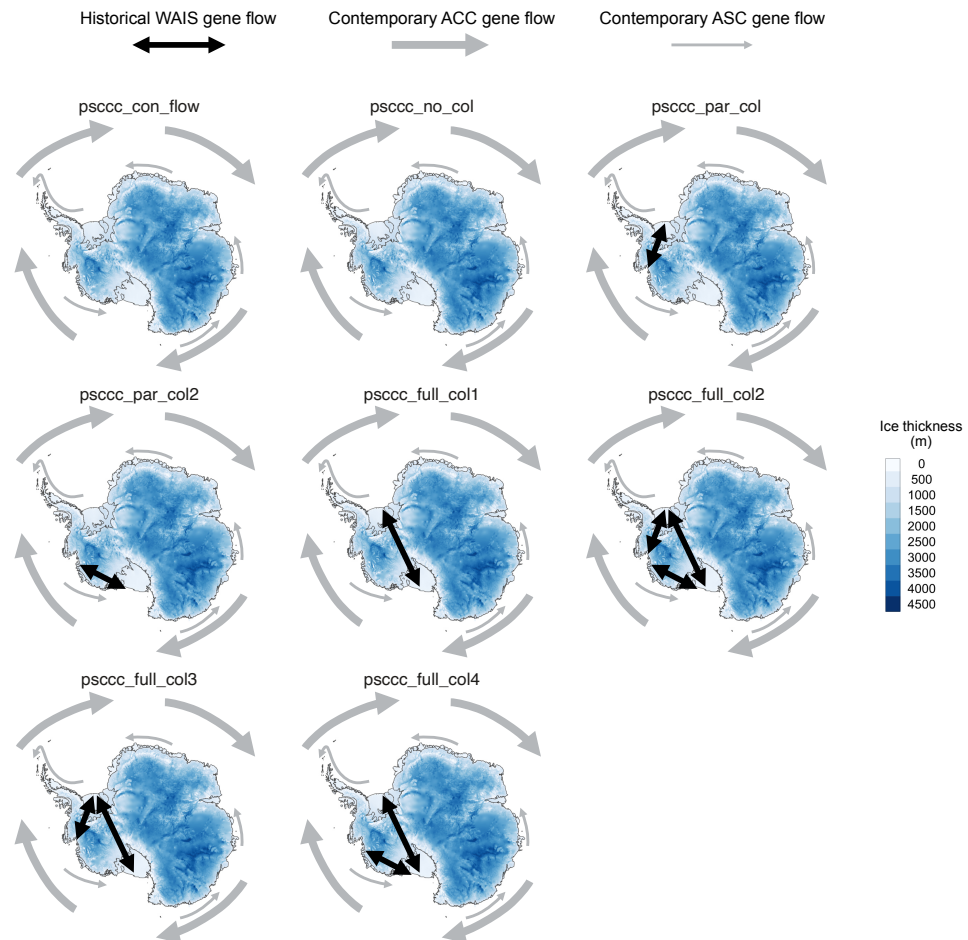

414 **Fig. S4.**  
415 **Illustrations of the contrasting demographic models to deduce signatures of historical**  
416 **trans-West Antarctic seaways connectivity in *Pareledone turqueti*.** (A) At step 1 of the  
417 hierarchical demographic modelling approach, contrasting scenarios of past Western Antarctic  
418 Ice Sheet (WAIS) configurations were compared. It was hypothesised that since population  
419 divergence, the WS, AS and RS may have experienced any, partial, or complete connectivity  
420 (black arrows), followed by contemporary circumpolar gene flow driven by the Antarctic  
421 Circumpolar Current (ACC, clockwise flowing; grey thick arrows) linking between the WS, AS,  
422 RS and EA. (B) At step 2, more complex models were further considered; they included both  
423 directionalities of the circumpolar gene flow, driven by the ACC (grey thick arrows) and  
424 Antarctic Slope Current (ASC, counter-clockwise flowing; grey thin arrows). Each model is  
425 labelled by the text above it. Maps illustrate ice thickness of the modern Antarctic Ice Sheet and  
426 are extracted from Bedmap2 (32).

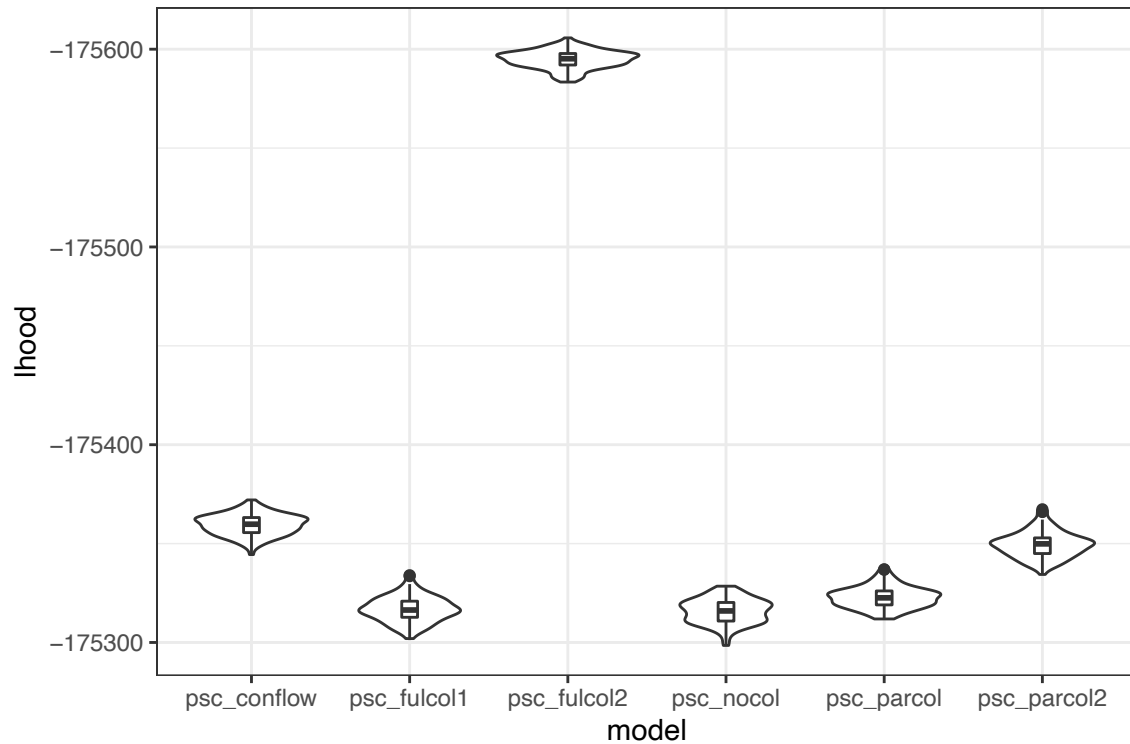

427  
 428  
 429  
 430  
 431  
 432  
 433  
 434

**Fig. S5.** Comparisons of demographic models at step 1 in *Pareledone turqueti* (see fig. S3 for visualisations of the models). The distributions of loglikelihood (lhood) from 100 independent expected SFS (violin plot), with each approximated using 500,000 coalescent simulations under the parameters that maximised the likelihood for each model. Each box represents the interquartile range (25<sup>th</sup> and 75<sup>th</sup> percentile), each line represents the median, each dot represents outlier values > 1.5x and < 3x the interquartile range.



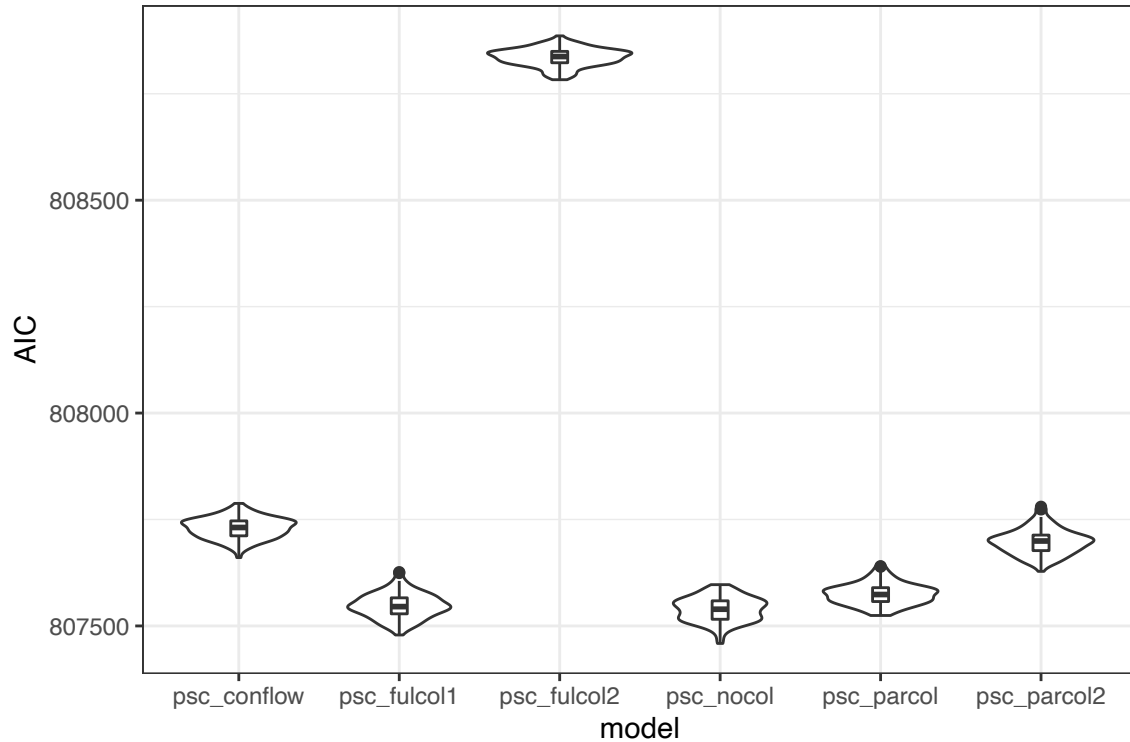

435  
 436  
 437  
 438  
 439  
 440  
 441  
 442  
 443

**Fig. S6.**

Comparisons of demographic models at step 1 in *Pareledone turqueti* (see fig. S3 for visualisations of the models). The distributions of AIC from 100 independent expected SFS (violin plot), with each approximated using 500,000 coalescent simulations under the parameters that maximised the likelihood for each model. Each box represents the interquartile range (25<sup>th</sup> and 75<sup>th</sup> percentile), each line represents the median, each dot represents outlier values > 1.5x and < 3x the interquartile range.

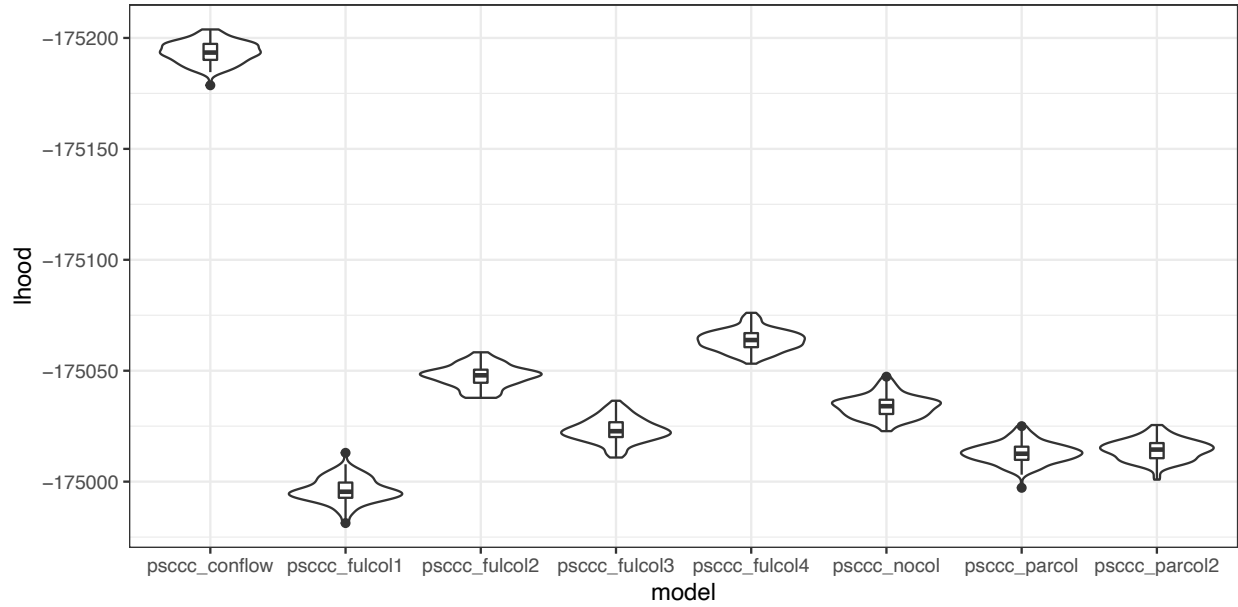

444  
 445 **Fig. S7.**  
 446 Comparisons of demographic models at step 2 in *Pareledone turqueti* (see fig. S3 for  
 447 visualisations of the models). The distributions of loglikelihood (lhood) from 100 independent  
 448 expected SFS (violin plot), with each approximated using 500,000 coalescent simulations under  
 449 the parameters that maximised the likelihood for each model. Each box represents the  
 450 interquartile range (25<sup>th</sup> and 75<sup>th</sup> percentile), each line represents the median, each dot represents  
 451 outlier values > 1.5x and < 3x the interquartile range.

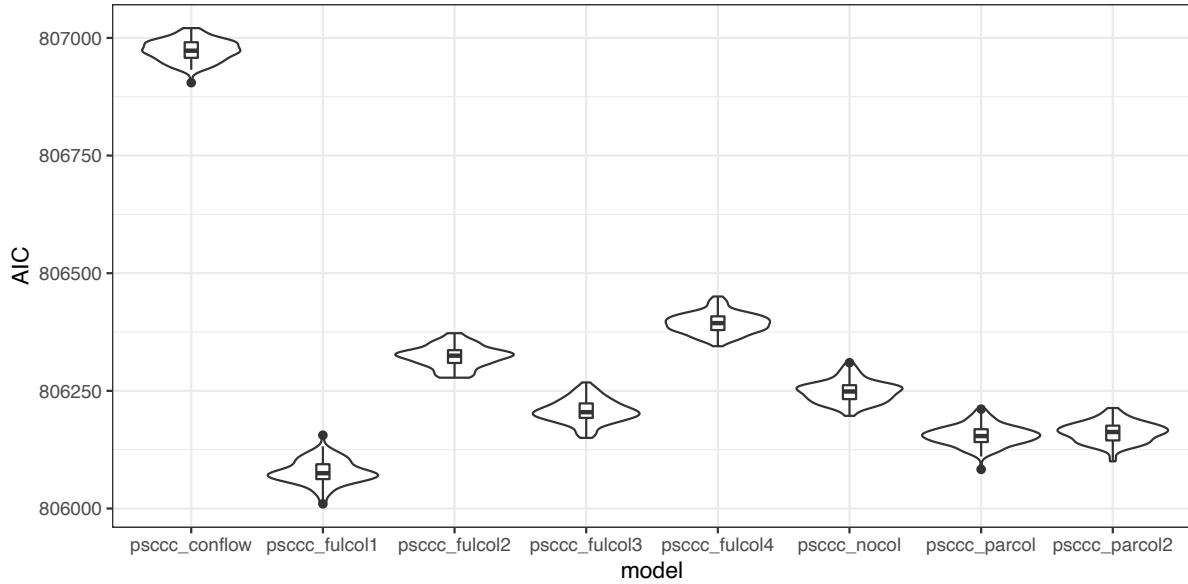

452  
 453  
 454  
 455  
 456  
 457  
 458  
 459

**Fig. S8.**

Comparisons of demographic models at step 2 in *Pareledone turqueti* (see fig. S3 for visualisations of the models). The distributions of AIC from 100 independent expected SFS (violin plot), with each approximated using 500,000 coalescent simulations under the parameters that maximised the likelihood for each model. Each box represents the interquartile range (25<sup>th</sup> and 75<sup>th</sup> percentile), each line represents the median, each dot represents outlier values > 1.5x and < 3x the interquartile range.

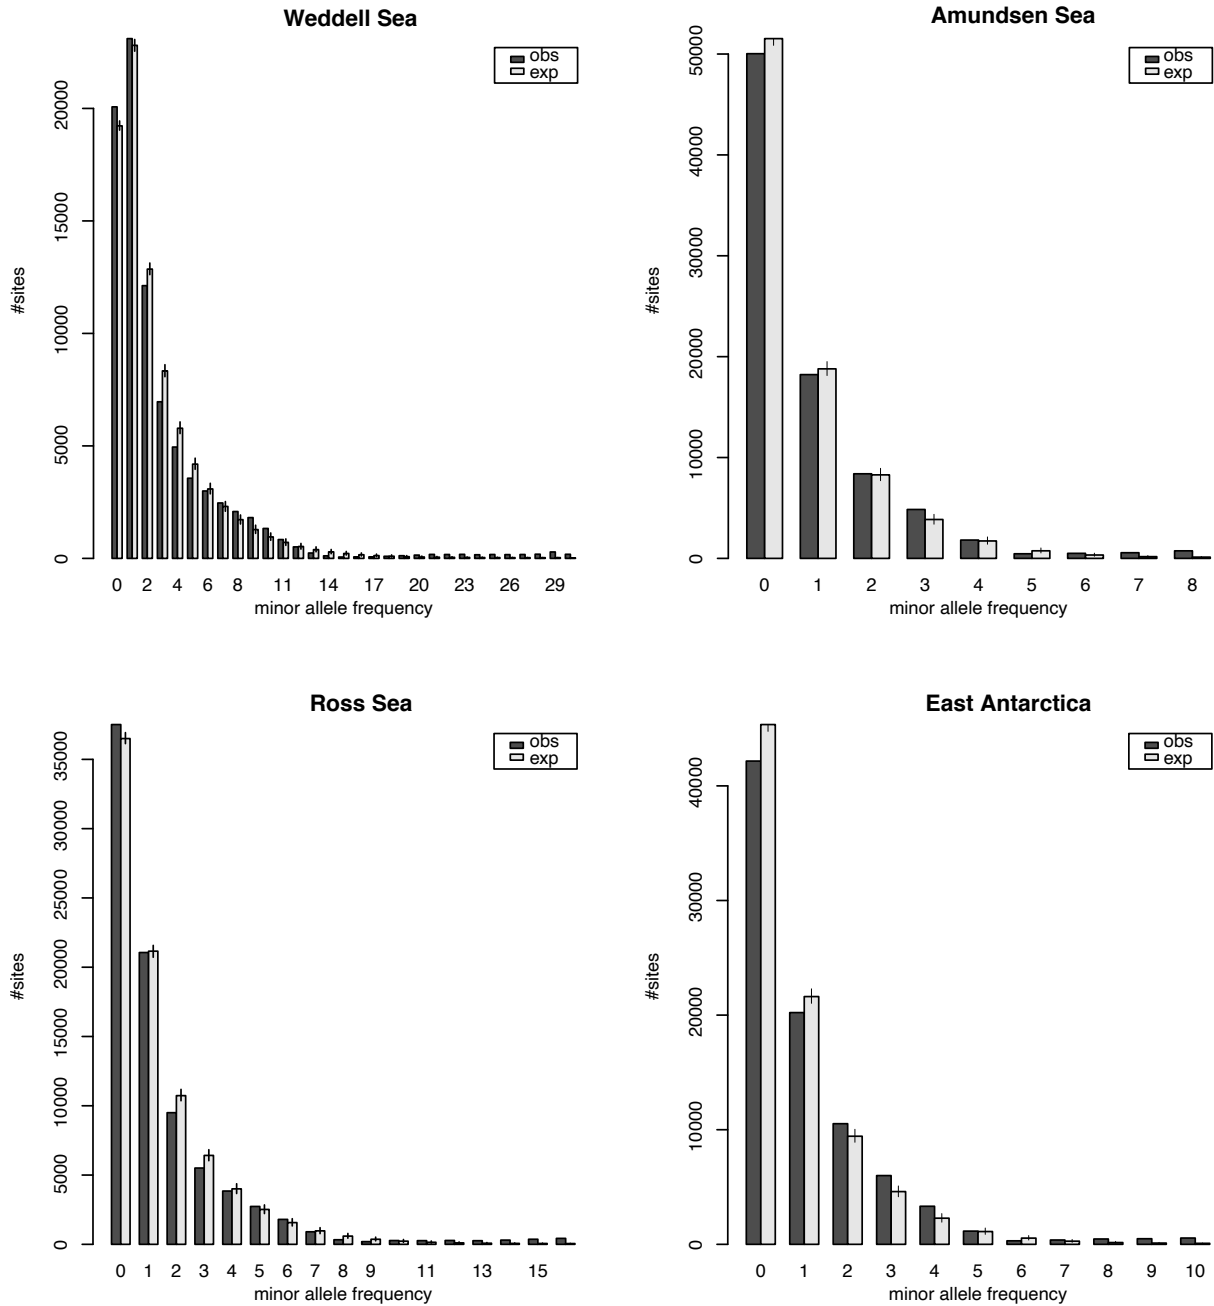

460  
461  
462  
463  
464  
465  
466

**Fig. S9.**

Fit of the expected and observed one-dimensional (1D)-SFS under the best model evaluated ('psccc\_ful\_coll') for *Pareledone turqueti*. Marginal 1D-SFS of the observed data (black bars) is compared to the averaged expected SFS (light grey bars) obtained from 100 SFS approximated with 500,000 coalescent simulations. Error bars = range of the values obtained across 100 simulated expected SFS under the parameters that maximised the likelihoods.

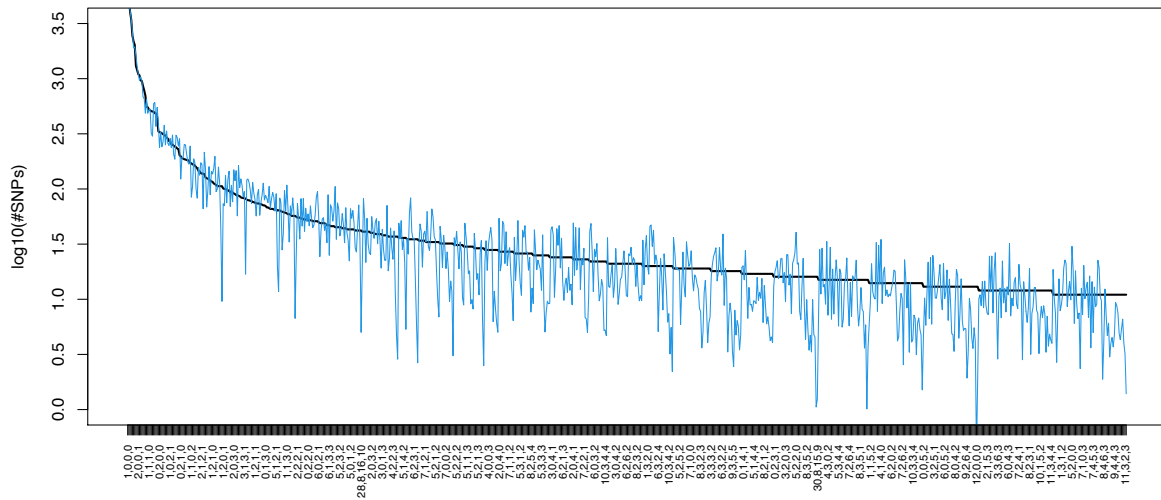

467  
 468 **Fig. S10.**  
 469 Fit of the expected to observed four-dimensional (4D)-SFS under the best model evaluated  
 470 ('pssc\_ful\_coll') for *Pareledone turqueti*. Only entries with more than 10 SNPs are shown.  
 471 Entries in the x-axis are indicated by column in the format of (AS, RS, EA, WS), and numbers  
 472 within each entry correspond to the count of the derived allele in Amundsen Sea (AS), Ross Sea  
 473 (RS), East Antarctica (EA) and Weddell Sea (WS). Solid black line represents observed SFS,  
 474 blue line represents averaged expected SFS. Averaged expected SFS was obtained from 100 SFS  
 475 approximated with 500,000 coalescent simulations under the parameters that maximised the  
 476 likelihoods.

477 **Table S1.**

478 **Demographic parameters inferred in the best model (psccc\_full\_coll) in *Pareledone turqueti*.** Maximum-likelihood (ML)  
 479 parameter estimates were extracted from the best run with the highest composite likelihood among 100 replicates. Probability of  
 480 emigration (m) from pop i to pop j is denoted as MIGij looking backward in time. Number of migrants per generation from pop j to  
 481 pop i is denoted as IM\_MIGij\$, and is scaled as 2Nm (2N = population effective sizes in diploid), looking forward in time. Effective  
 482 population sizes are given in the number of haploids (N). Estimations of timing of events are given in the number of generations (gen)  
 483 and years. The 95% confidence intervals (CI) were generated from 100 block-bootstrapped datasets. Abbreviations: Weddell Sea  
 484 (WS), Amundsen Sea (AS), Ross Sea (RS), East Antarctica (EA).

| Parameter | Parameter description                                                                             | ML estimate | 95% CI      |             |
|-----------|---------------------------------------------------------------------------------------------------|-------------|-------------|-------------|
|           |                                                                                                   |             | Lower bound | Upper bound |
| NEAS\$    | Effective population size of EA after T2                                                          | 1456        | 1281        | 230145      |
| NWS\$     | Effective population size of WS after T2                                                          | 20071       | 25482       | 142309      |
| NAS\$     | Effective population size of AS after T2                                                          | 107251      | 3213        | 772442      |
| NRS\$     | Effective population size of RS after T2                                                          | 12339       | 14592       | 332691      |
| NEAC\$    | Effective population size of EA after T1                                                          | 570182      | 32935       | 730432      |
| NWSC\$    | Effective population size of WS after T1                                                          | 663252      | 231105      | 923873      |
| NASC\$    | Effective population size of AS after T1                                                          | 23384       | 12140       | 684397      |
| NRSC\$    | Effective population size of RS after T1                                                          | 301550      | 33424       | 747585      |
| NANC2\$   | Effective population size of the ancestral population of AS, WS, RS and EA after T0               | 1332567     | 1428602     | 3501509     |
| NANC1\$   | Effective population size of the ancestral population of AS, WS, RS and EA before T0              | 8694        | 9564        | 32259       |
| T1 (gen)  | Time of trans-West Antarctic seaway connectivity between WS-RS (in generations)                   | 5797        | 5638        | 22090       |
| T0 (gen)  | Time of demographic change in the ancestral population of WS, AS, RS and EA (in generations)      | 147535      | 158889      | 500302      |
| T2 (gen)  | Time of contemporary gene flow between WS-AS-RS-EA driven by circumpolar current (in generations) | 1851        | 2372        | 16305       |
| T1 (year) | Time of trans-West Antarctic seaway connectivity between WS-RS (in years)                         | 69564       | 67656       | 265080      |
| T0 (year) | Time of demographic change in the ancestral population of WS, AS, RS and EA (in years)            | 1770420     | 1906668     | 6003624     |
| T2 (year) | Time of contemporary gene flow between WS-AS-RS-EA driven by circumpolar current (in years)       | 22212       | 28464       | 195660      |
| MIG10\$   | Probability of emigration from AS to WS after T2 (backward in time)                               | 5.83E-08    | 1.90E-09    | 2.38E-03    |
| MIG30\$   | Probability of emigration from EA to WS after T2 (backward in time)                               | 1.25E-02    | 3.63E-05    | 1.33E-02    |

|             |                                                                              |          |          |          |
|-------------|------------------------------------------------------------------------------|----------|----------|----------|
| MIG01\$     | Probability of emigration from WS to AS after T2 (backward in time)          | 9.40E-04 | 7.77E-05 | 6.85E-04 |
| MIG21\$     | Probability of emigration from RS to AS after T2 (backward in time)          | 1.54E-03 | 1.17E-08 | 1.23E-03 |
| MIG12\$     | Probability of emigration from AS to RS after T2 (backward in time)          | 5.67E-05 | 7.42E-10 | 5.57E-03 |
| MIG32\$     | Probability of emigration from EA to RS after T2 (backward in time)          | 8.81E-03 | 5.61E-08 | 8.78E-03 |
| MIG03\$     | Probability of emigration from WS to EA after T2 (backward in time)          | 1.54E-04 | 1.83E-09 | 2.04E-04 |
| MIG23\$     | Probability of emigration from RS to EA after T2 (backward in time)          | 7.83E-04 | 1.19E-05 | 6.76E-04 |
| MIG02C\$    | Probability of emigration from RS to WS after T1 (backward in time)          | 1.05E-08 | 2.20E-10 | 3.14E-06 |
| MIG20C\$    | Probability of emigration from WS to RS after T1 (backward in time)          | 1.13E-08 | 2.92E-10 | 4.80E-06 |
| IM_MIG10\$  | Number of immigrants per generation from WS to AS after T2 (forward in time) | 3.13E-03 | 3.05E-06 | 921      |
| IM_MIG30\$  | Number of immigrants per generation from WS to EA after T2 (forward in time) | 9        | 2.33E-02 | 1527     |
| IM_MIG01\$  | Number of immigrants per generation from AS to WS after T2 (forward in time) | 9        | 1        | 49       |
| IM_MIG21\$  | Number of immigrants per generation from AS to RS after T2 (forward in time) | 10       | 8.52E-05 | 205      |
| IM_MIG12\$  | Number of immigrants per generation from RS to AS after T2 (forward in time) | 3        | 1.19E-06 | 2152     |
| IM_MIG32\$  | Number of immigrants per generation from RS to EA after T2 (forward in time) | 6        | 3.60E-05 | 1011     |
| IM_MIG03\$  | Number of immigrants per generation from EA to WS after T2 (forward in time) | 2        | 2.33E-05 | 15       |
| IM_MIG23\$  | Number of immigrants per generation from EA to RS after T2 (forward in time) | 5        | 8.68E-02 | 113      |
| IM_MIG02C\$ | Number of immigrants per generation from WS to RS after T1 (forward in time) | 1.58E-03 | 3.67E-06 | 1        |
| IM_MIG20C\$ | Number of immigrants per generation from RS to WS after T1 (forward in time) | 3.76E-03 | 3.37E-05 | 2        |

486 **Table S2.**

487 Results of outgroup-*f*<sub>3</sub>-statistics between pairs of populations. As *f*<sub>3</sub> value increases, more  
 488 derived allele frequency is shared between population A and population B related to an outgroup  
 489 population (population C). Abbreviations: Weddell Sea (WS), South Shetland Islands (SHE),  
 490 Amundsen Sea (AS), Ross Sea (RS), East Antarctica (EA), Shag Rocks and South Georgia  
 491 (SGSR; samples combined). Z-score values > 3 or < -3 = significance, stderr=standard error,  
 492 nsnp=number of SNPs involved in the statistics.  
 493

| <b>population A</b> | <b>population B</b> | <b>population C</b> | <b><i>f</i><sub>3</sub></b> | <b>stderr</b> | <b>Zscore</b> | <b>nsnp</b> |
|---------------------|---------------------|---------------------|-----------------------------|---------------|---------------|-------------|
| AS                  | RS                  | SRSR                | 0.054015                    | 0.001107      | 48.80         | 92000       |
| RS                  | EA                  | SRSR                | 0.046025                    | 0.001025      | 44.92         | 93586       |
| RS                  | WS                  | SRSR                | 0.045840                    | 0.000870      | 52.71         | 105128      |
| RS                  | SHE                 | SRSR                | 0.043447                    | 0.000787      | 55.24         | 97556       |
| AS                  | EA                  | SRSR                | 0.043384                    | 0.000957      | 45.35         | 86461       |
| AS                  | SHE                 | SRSR                | 0.042471                    | 0.000841      | 50.47         | 90359       |
| AS                  | WS                  | SRSR                | 0.042254                    | 0.000847      | 49.88         | 99122       |
| WS                  | SHE                 | SRSR                | 0.039757                    | 0.000702      | 56.63         | 102545      |
| WS                  | EA                  | SRSR                | 0.039279                    | 0.000876      | 44.84         | 99159       |
| SHE                 | EA                  | SRSR                | 0.030848                    | 0.000714      | 43.21         | 92090       |

494



495 **Table S3.**  
 496 Results of D-statistic between (in the form of BABA-ABBA) examining patterns of alleles  
 497 sharing across four populations, and indicates whether there is excess allele sharing between  
 498 distinct populations. Top panel: D-statistic is presented in the form of D(Pop, SHE, WS, Out),  
 499 which examines whether there is excess allele sharing between SHE and WS ( $D < 0$ ; ABBA) or  
 500 Pop and WS ( $D > 0$ ; BABA). Bottom panel: D-statistic is presented in the form of D(Pop, EA,  
 501 WS, Out), which examines whether there is excess allele sharing between EA and WS ( $D < 0$ ;  
 502 ABBA) or Pop and WS ( $D > 0$ ; BABA). Abbreviations: Weddell Sea (WS), South Shetland  
 503 Islands (SHE), Amundsen Sea (AS), Ross Sea (RS), East Antarctica (EA), Shag Rocks and  
 504 South Georgia (SRSG; samples combined as an outgroup population [Out]). Z-score values  $> 3$   
 505 or  $< -3$  = significance, stderr=standard error, nsnp=number of SNPs involved in the statistics.  
 506

| <b>D-statistic presentation</b> | <b>W</b> | <b>X</b> | <b>Y</b> | <b>Z</b> | <b>D</b> | <b>stderr</b> | <b>Zscore</b> | <b>BABA</b> | <b>ABBA</b> | <b>nsnps</b> |
|---------------------------------|----------|----------|----------|----------|----------|---------------|---------------|-------------|-------------|--------------|
| <i>D</i> (Pop, SHE, WS, Out)    | AS       | SHE      | WS       | SRSG     | 0.0113   | 0.001857      | 6.084         | 1576        | 1541        | 120857       |
| <i>/ D</i> (W, X, Y, Z)         | RS       | SHE      | WS       | SRSG     | 0.0284   | 0.001838      | 15.447        | 1554        | 1468        | 120857       |
| <i>D</i> (Pop, EA, WS, Out)     | AS       | EA       | WS       | SRSG     | 0.0130   | 0.002007      | 6.465         | 1638        | 1596        | 120857       |
| <i>/ D</i> (W, X, Y, Z)         | RS       | EA       | WS       | SRSG     | 0.0295   | 0.001870      | 15.770        | 1616        | 1523        | 120857       |

507

508 **Table S4.**  
 509 Summary of likelihoods for the model tested at step 1 in *Pareledone turqueti*. Model label  
 510 corresponds to model label in fig. S3-S4. Delta AIC and relative likelihoods were calculated  
 511 following Excoffier et al. (2013) (34). Abbreviations: Lhood = log likelihoods, AIC = Akaike  
 512 Information Criterion.  
 513

| <b>Model label</b> | <b>log10(Lhood)</b> | <b>Number of parameters</b> | <b>AIC</b> | <b>Delta AIC</b> | <b>Relative likelihood (Akaike's weight of evidence)</b> |
|--------------------|---------------------|-----------------------------|------------|------------------|----------------------------------------------------------|
| psc_nocol          | -175298.50          | 17                          | 807458.91  | 0.00             | 1.00                                                     |
| psc_fulcol1        | -175301.95          | 19                          | 807478.78  | 19.87            | 0.00                                                     |
| psc_parcol         | -175311.88          | 19                          | 807524.54  | 65.63            | 0.00                                                     |
| psc_parcol2        | -175334.40          | 19                          | 807628.23  | 169.32           | 0.00                                                     |
| psc_conflow        | -175344.44          | 12                          | 807660.49  | 201.59           | 0.00                                                     |
| psc_fulcol2        | -175583.38          | 23                          | 808783.05  | 1324.15          | 0.00                                                     |

514

515 **Table S5.**  
 516 Summary of likelihoods for the model tested at Step 2 in Pareledone turqueti. Model label  
 517 corresponds to model label in fig. S3-S4. Delta AIC and relative likelihoods were calculated  
 518 following Excoffier et al. (2013) (34). Abbreviations: Lhood = log likelihoods, AIC = Akaike  
 519 Information Criterion.

| <b>Model label</b> | <b>log10(Lhood)</b> | <b>Number of parameters</b> | <b>AIC</b> | <b>Delta AIC</b> | <b>Relative likelihood (Akaike's weight of evidence)</b> |
|--------------------|---------------------|-----------------------------|------------|------------------|----------------------------------------------------------|
| psccc_fulcol1      | -174981.32          | 23                          | 806009.97  | 0.00             | 1.00                                                     |
| psccc_parcol       | -174997.22          | 23                          | 806083.19  | 73.22            | 0.00                                                     |
| psccc_parcol2      | -175000.91          | 23                          | 806100.20  | 90.24            | 0.00                                                     |
| psccc_fulcol3      | -175010.87          | 25                          | 806150.08  | 140.11           | 0.00                                                     |
| psccc_nocol        | -175022.77          | 21                          | 806196.88  | 186.91           | 0.00                                                     |
| psccc_fulcol2      | -175037.78          | 27                          | 806278.02  | 268.05           | 0.00                                                     |
| psccc_fulcol4      | -175053.17          | 25                          | 806344.88  | 334.92           | 0.00                                                     |
| psccc_conflow      | -175178.67          | 16                          | 806904.94  | 894.98           | 0.00                                                     |

520

521 **Data S1. (separate file: DataS1-S2.xlsx)**

522 Sample information of *Pareledone turqueti* (n=96) sequenced with target capture sequencing of  
523 ddRAD loci.

524

525 **Data S2. (separate file: DataS1-S2.xlsx)**

526 Sample information of all Southern Ocean octopod samples (n=440, including 22 technical  
527 replicates) sequenced with ddRAD sequencing.
